# Supplementary material for: The Impact of MISR-derived Injection Height Initialization on Wildfire and Volcanic Plume Dispersion in the HYSPLIT Model
Source: Copernicus journal article supplement (doi:10.5194/amt-2018-123), 2018-05-23

# 1 Supplemental Material

2

## 3 Figure 1

4

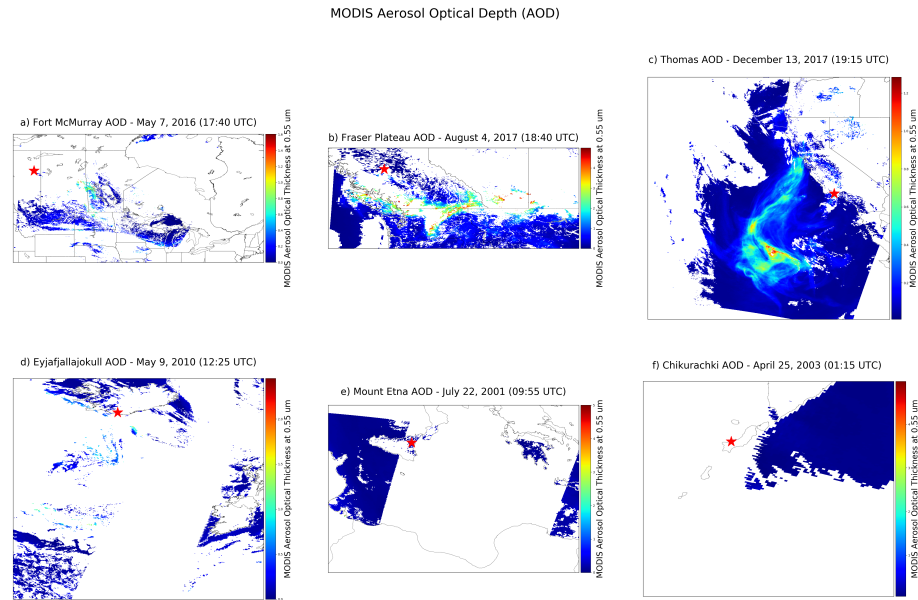

5

6

## 7 Yosemite Rim Fire Plume, August 2013

8 The Yosemite Rim Fire was also one of the simulations performed for this study  
9 but is temporarily being left in supplemental material. It is possible that the method used  
10 to convert BlueSky data into a HYSPLIT compatible format or the BlueSky data itself  
11 could be inaccurate since there was an older version of BlueSky in 2013. We are  
12 currently waiting on confirmation from the National Center for Environmental Prediction  
13 about whether we can call this simulation nominal. The analysis of the simulations that  
14 were performed can be found below.

15 August 23<sup>rd</sup>, 2013, Day 1 of our Yosemite Rim Fire simulations, shows noticeable  
16 differences between the nominal and MISR-initialized plumes. Figure 2b shows the  
17 sounding at KRNO (August 24<sup>th</sup>, 2013 00 UCT) just north of Yosemite, which indicates  
18 that the PBL height is approximately 4.5 kilometers. The GDAS meteorological fields  
19 The MINX injection height was 6.2 kilometers and the HYSPLIT calculation placed the  
20 injection height at 3 kilometers. This case again indicates the importance of accurately  
21 initializing the smoke plume height, especially when it is above the top of the boundary  
22 layer. The wind shifts just above the PBL changing from 10 knots out of the west to 15-  
23 20 knots out of the south. As the nominal HYSPLIT simulation injects the smoke below  
24 the height where this occurs, Figure 4 shows that the plume does not extend nearly as far  
25 downwind as the MISR-initialized plume. In this case, the MISR-initialized plume  
26 reaches from the United States north beyond the border with Canada. Both the optical  
27 depth map and the visible imagery show a well defined, optically thick smoke plume

1 extending from Yosemite past the border and then looping back to the southeast. The  
2 nominal model simulation has visible smoke extending only to the southern border of  
3 Idaho, whereas the MISR-initialized run shows visible smoke reaching the border, in  
4 much better agreement with observations.  
5  
6

4) Yosemite Rim Fire Simulation - August 23, 2013 (18:55 UTC)

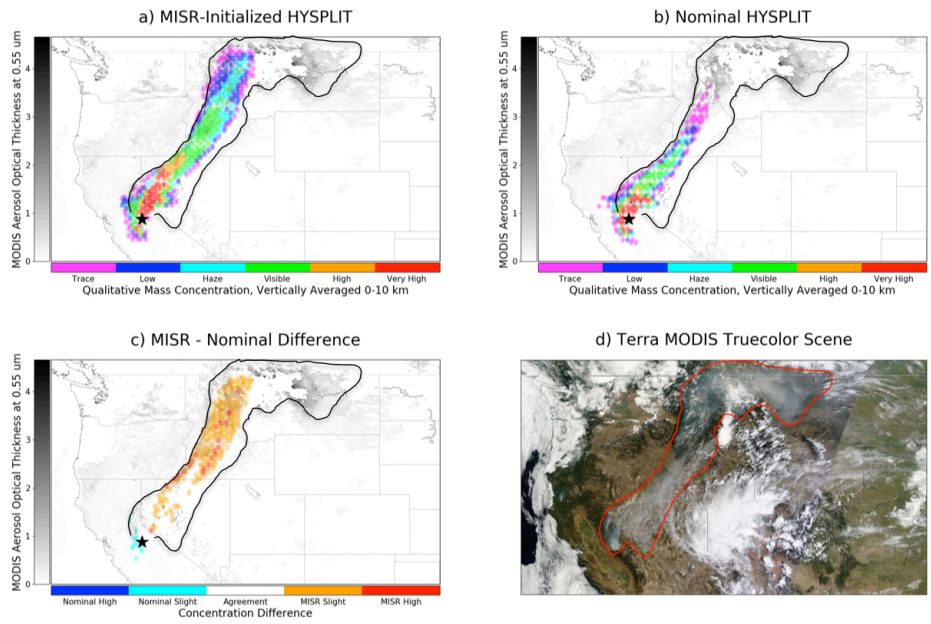

7  
8  
9  
10  
11  
12  
13

## Additional Figures

Yosemite

Yosemite Rim Fire Simulation - August 24, 2013 (21:15 UTC)

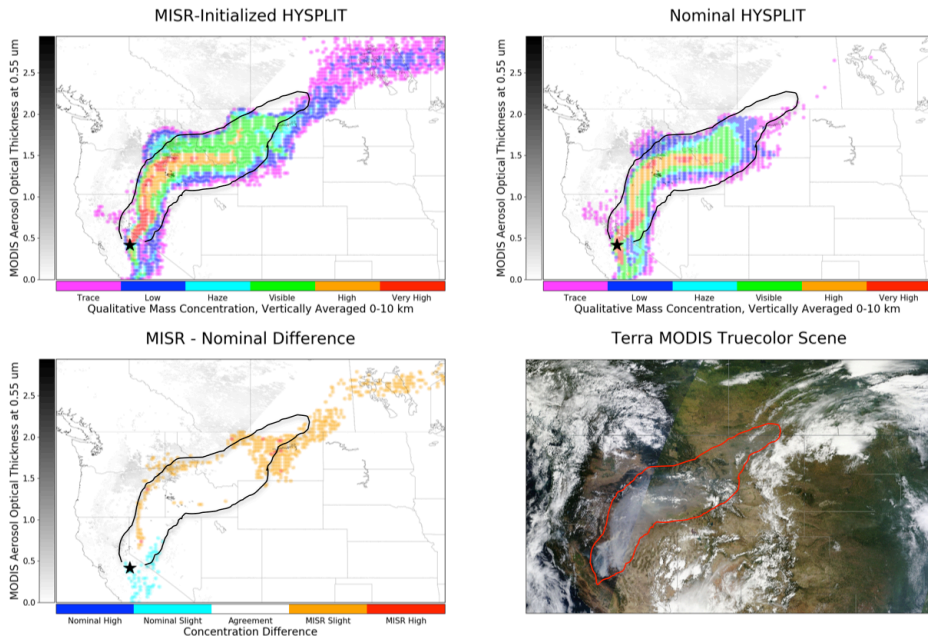

1  
2

Yosemite Rim Fire Simulation - August 25, 2013 (18:45 UTC)

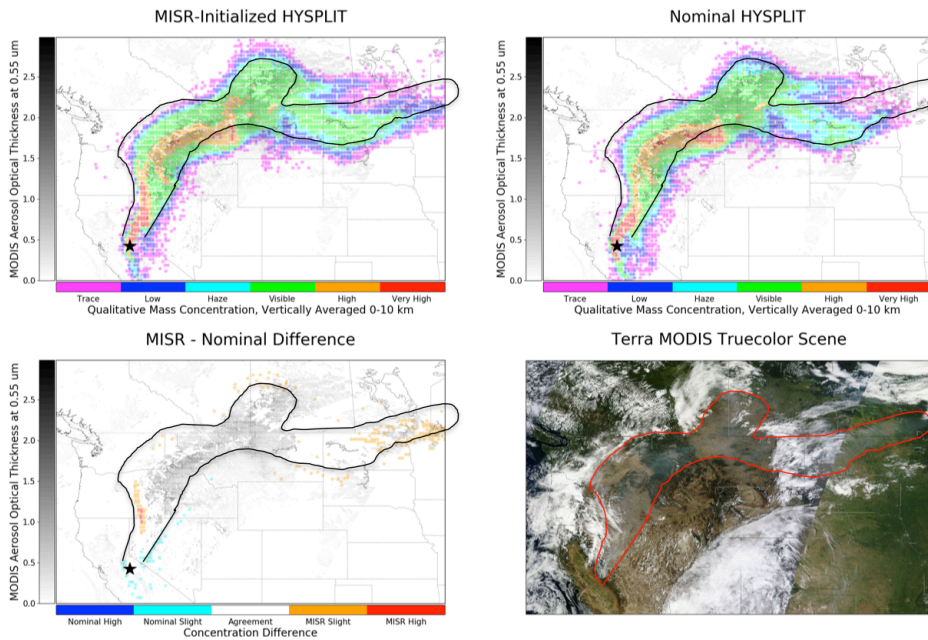

3  
4

Yosemite Rim Fire Simulation - August 26, 2013 (19:25 UTC)

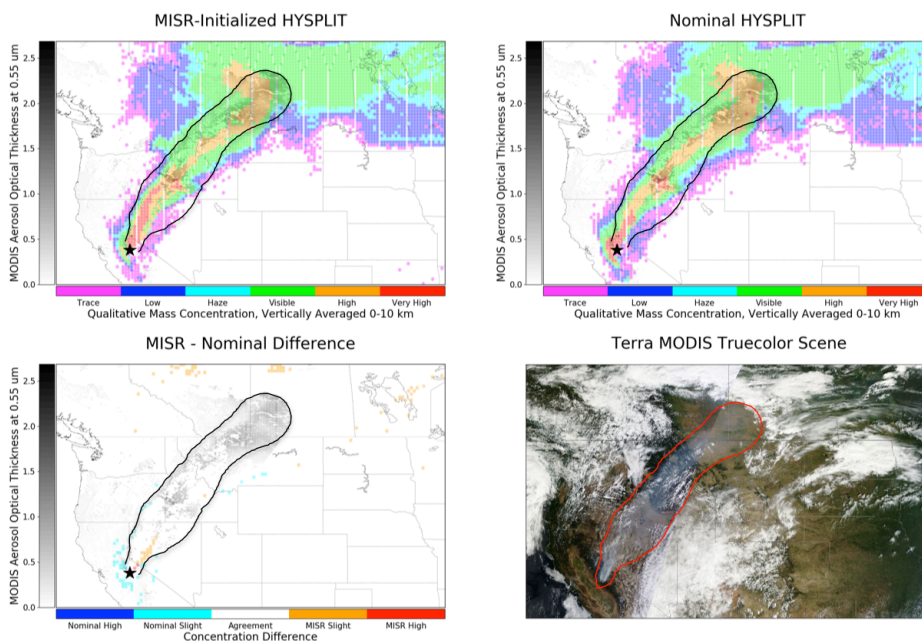

1  
2  
3  
4

Fort McMurray

Fort McMurray Wildfire Simulation - May 6, 2016 (18:35 UTC)

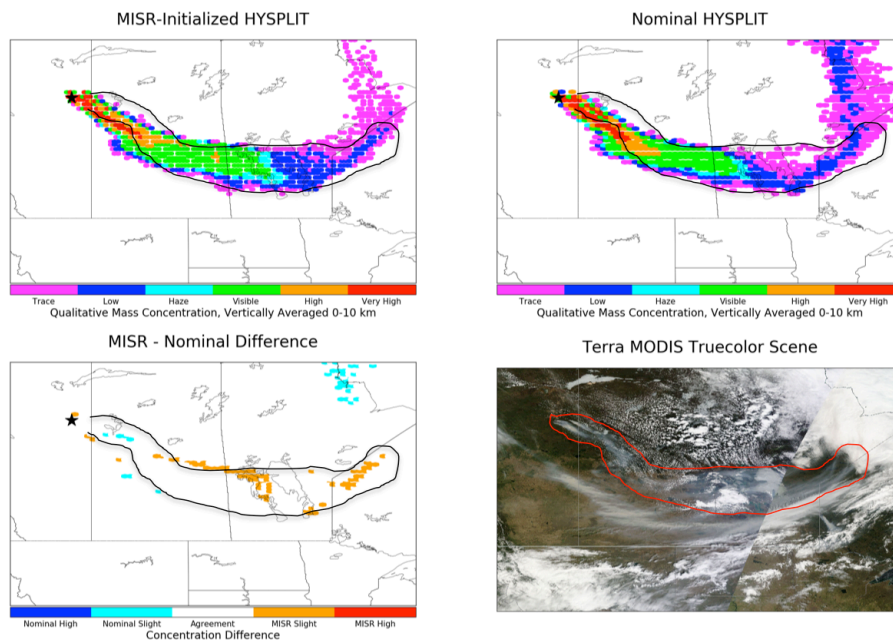

5  
6



Fort McMurray Wildfire Simulation - May 8, 2016 (18:20 UTC)

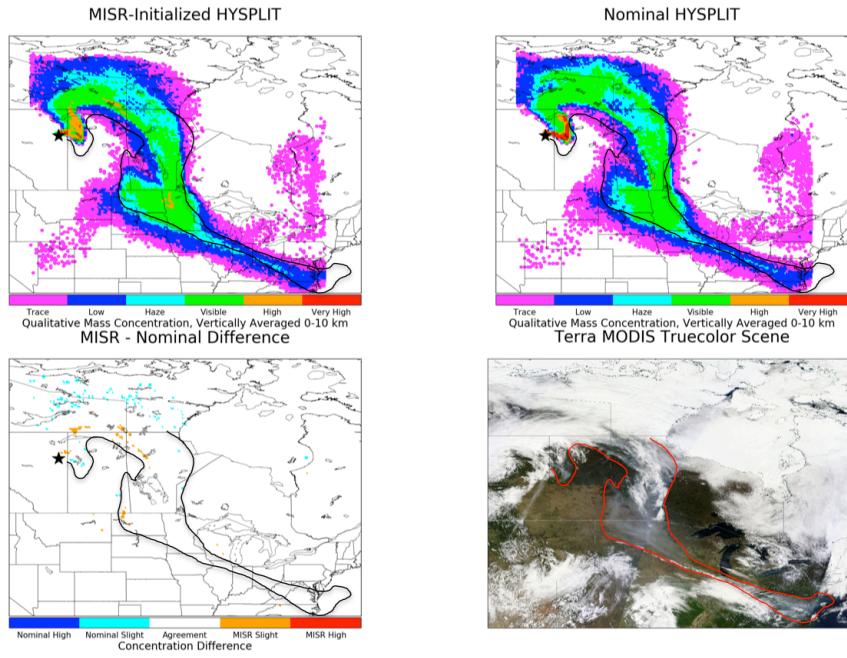

1  
2

Fort McMurray Wildfire Simulation - May 9, 2016 (19:10 UTC)

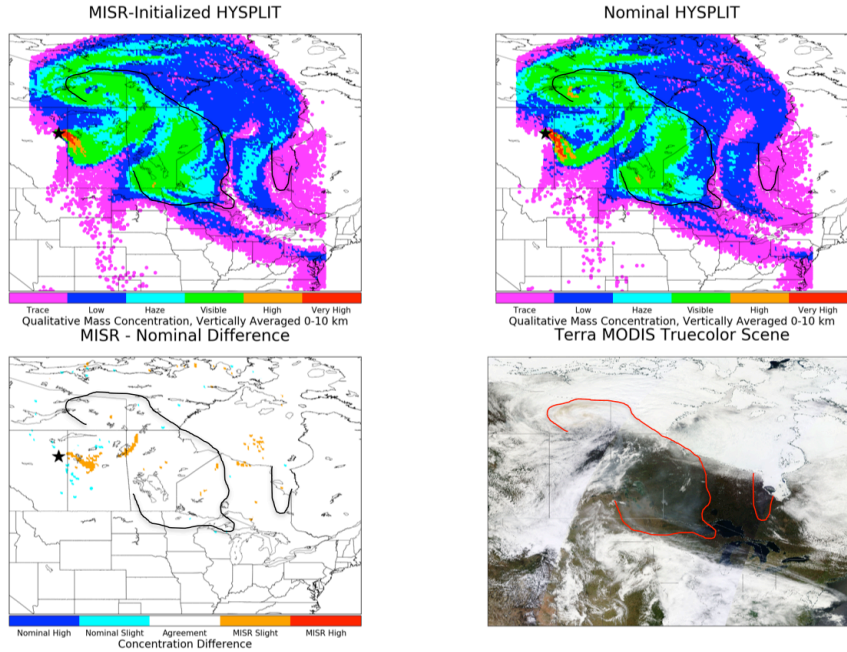

3  
4  
5  
6

Fraser Plateau

Fraser Plateau Wildfire Simulation - August 3, 2017 (19:35 UTC)

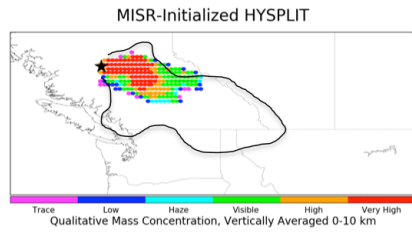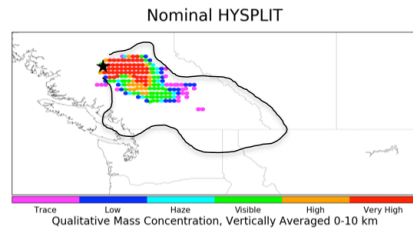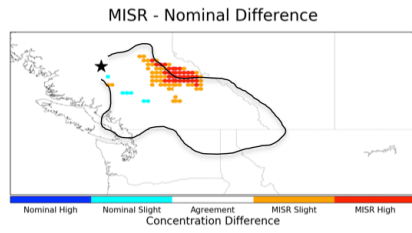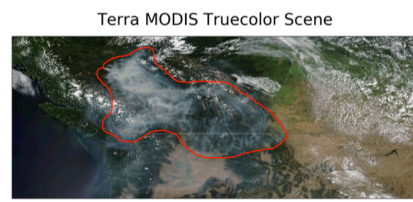

1  
2

Fraser Plateau Wildfire Simulation - August 5, 2017 (21:10 UTC)

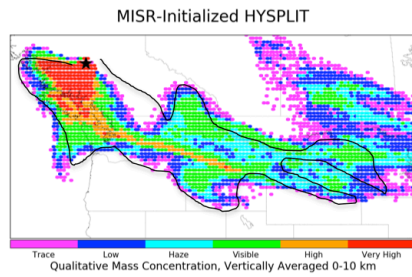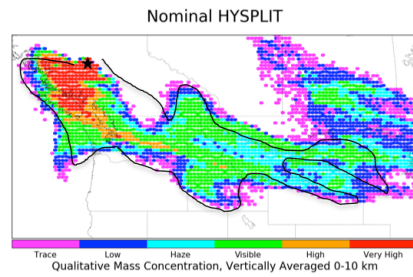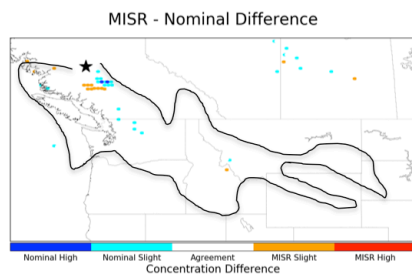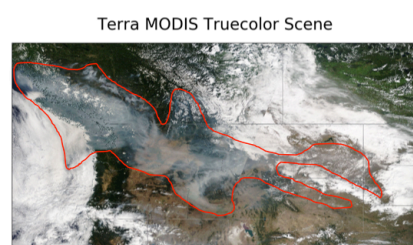

3  
4

Fraser Plateau Wildfire Simulation - August 6, 2017 (18:30 UTC)

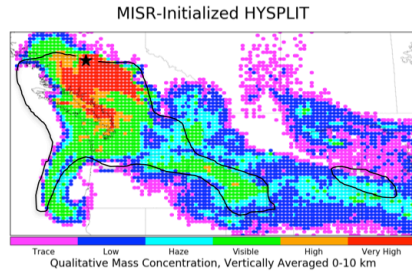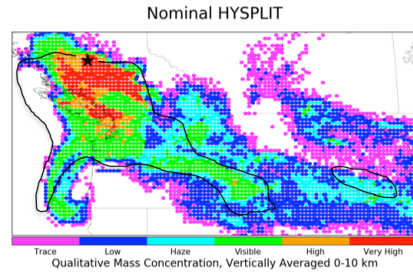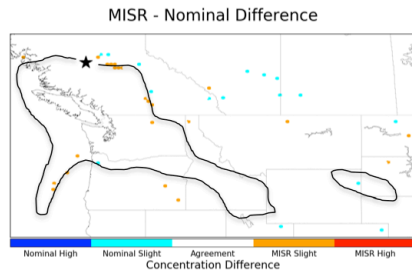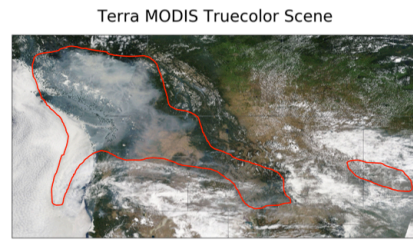

- 1
- 2
- 3
- 4

Thomas Fire

Thomas Wildfire Simulation - December 10, 2017 (18:45 UTC)

a) MISR-Initialized HYSPLIT

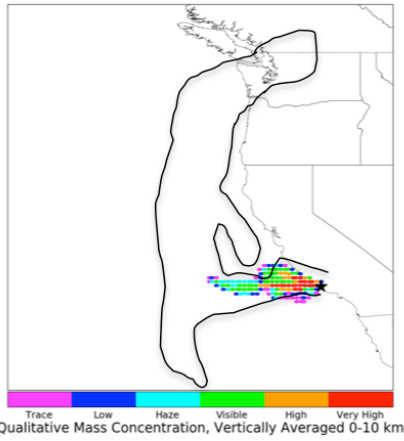

b) Nominal HYSPLIT

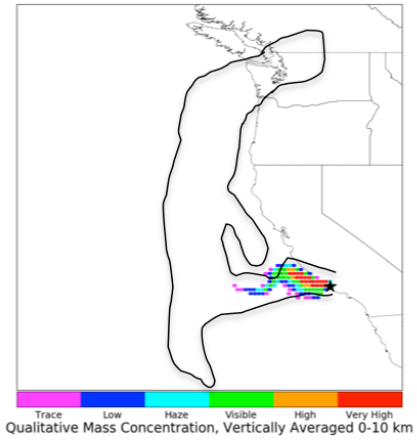

c) MISR - Nominal Difference

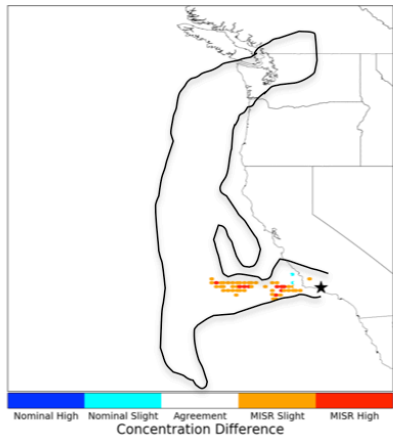

d) Terra MODIS Truecolor Scene

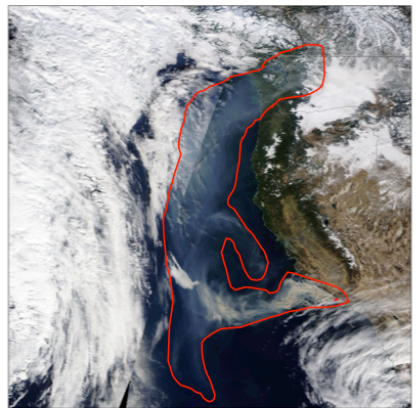



Thomas Wildfire Simulation - December 11, 2017 (19:25 UTC)

MISR-Initialized HYSPLIT

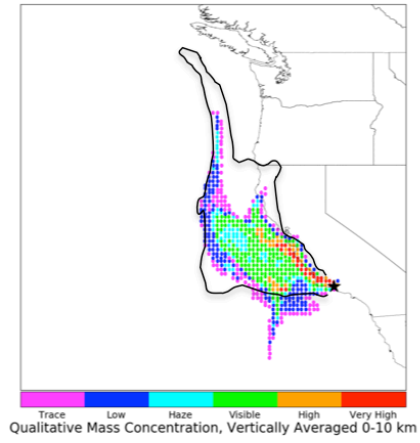

Nominal HYSPLIT

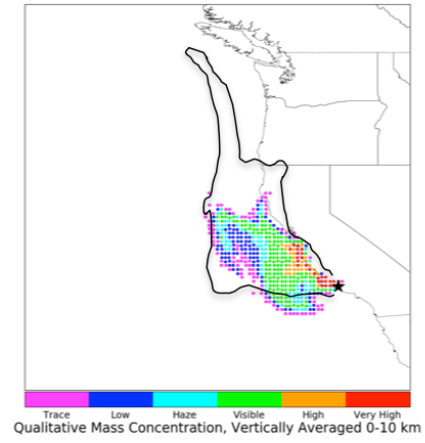

MISR - Nominal Difference

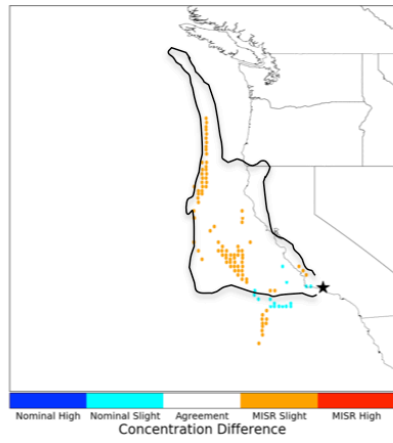

Terra MODIS Truecolor Scene

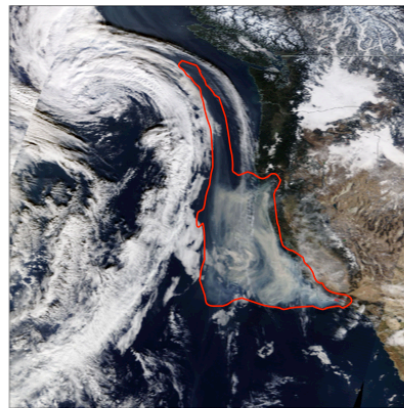

Thomas Wildfire Simulation - December 12, 2017 (18:30 UTC)

MISR-Initialized HYSPLIT

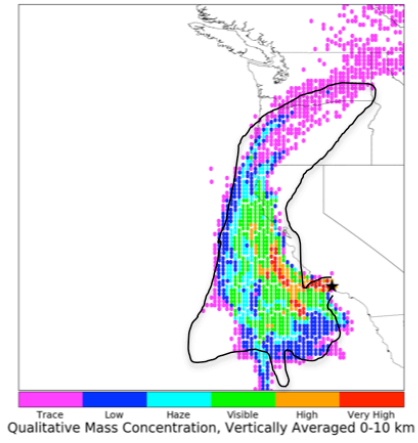

Nominal HYSPLIT

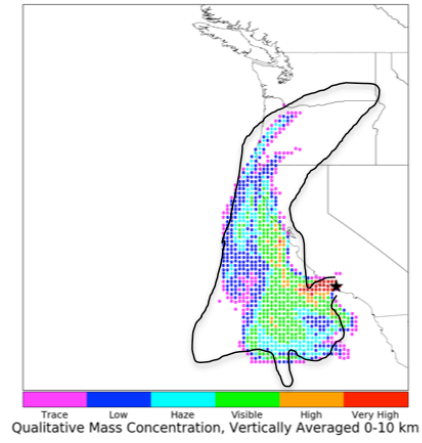

MISR - Nominal Difference

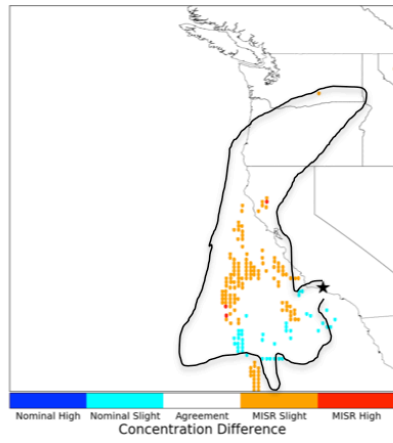

Terra MODIS Truecolor Scene

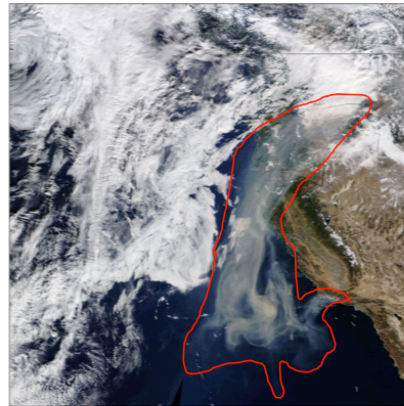

- 1
- 2
- 3
- 4

Thomas Fire with NAM12

Thomas Wildfire Simulation (With NAM12) - December 10, 2017 (18:45 UTC)

a) MISR-Initialized HYSPLIT

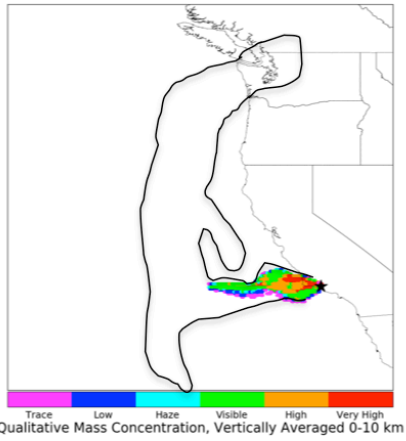

b) Nominal HYSPLIT

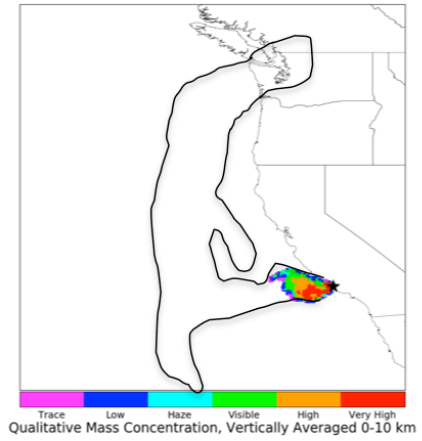

c) MISR - Nominal Difference

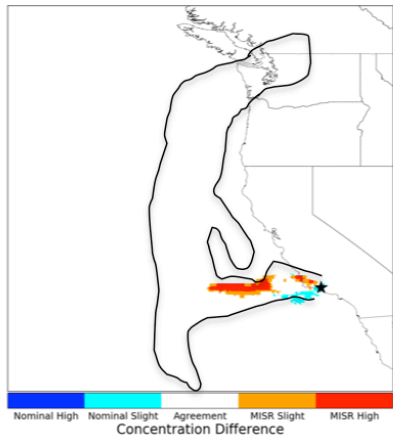

d) Terra MODIS Truecolor Scene

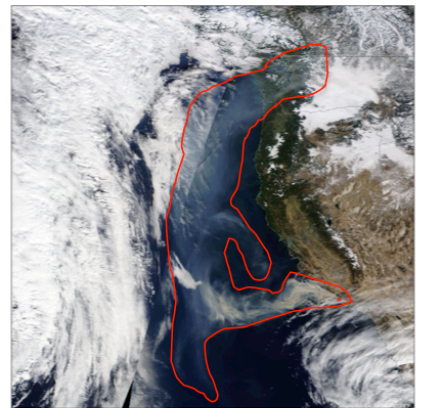

Thomas Wildfire Simulation (With NAM12) - December 11, 2017 (19:25 UTC)

MISR-Initialized HYSPLIT

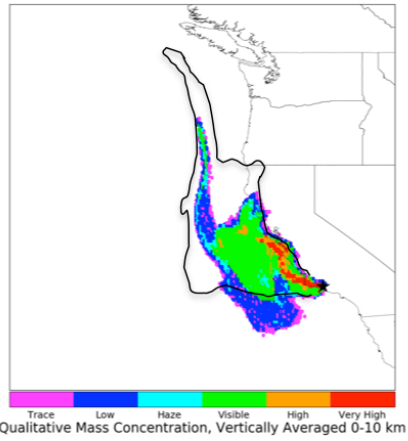

Nominal HYSPLIT

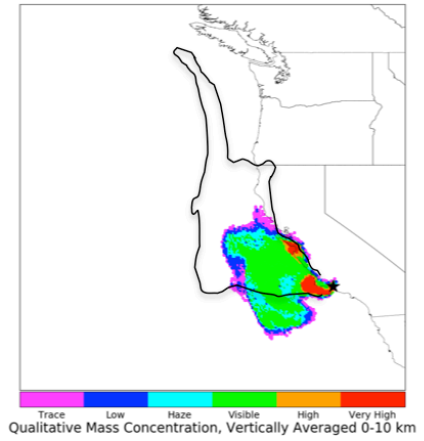

MISR - Nominal Difference

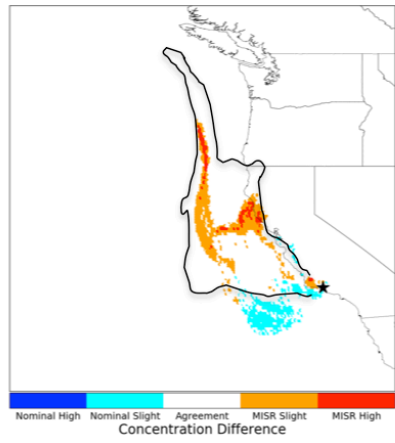

Terra MODIS Truecolor Scene

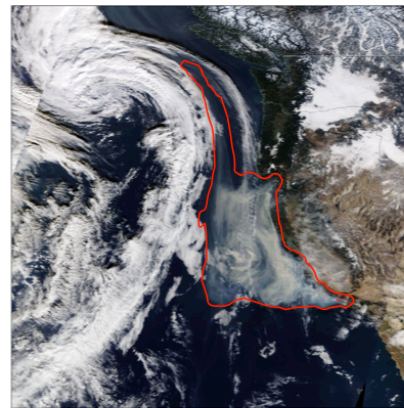



Thomas Wildfire Simulation (With NAM12) - December 12, 2017 (18:30 UTC)

MISR-Initialized HYSPLIT

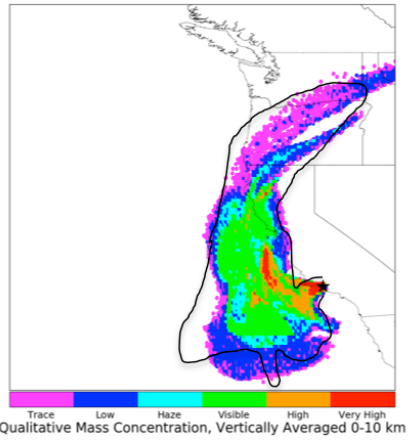

Nominal HYSPLIT

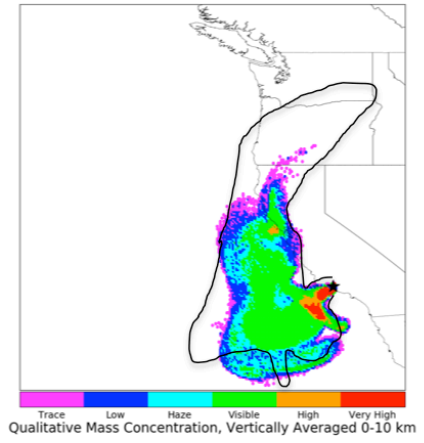

MISR - Nominal Difference

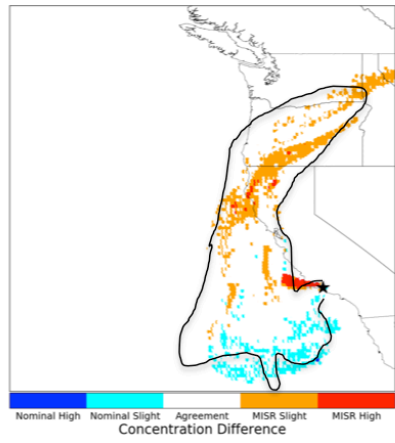

Terra MODIS Truecolor Scene

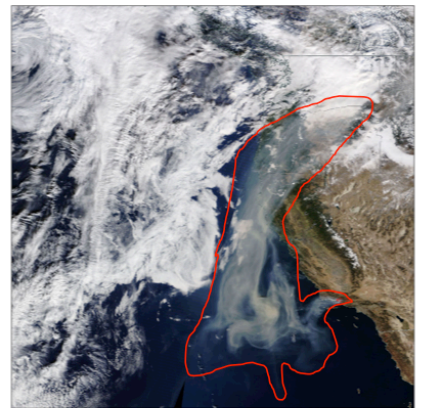

- 1
- 2
- 3 Eyjafjallajokull
- 4

Eyjafjallajokull Eruption Simulation - May 7, 2010 (12:35 UTC)

MISR-Initialized HYSPLIT

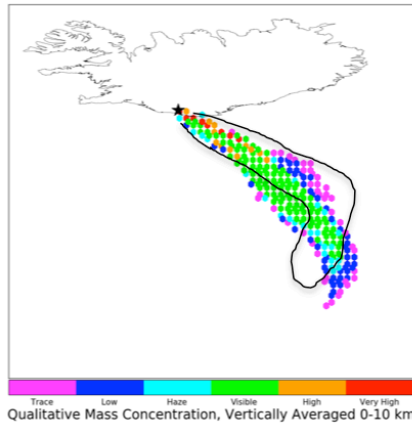

Nominal HYSPLIT

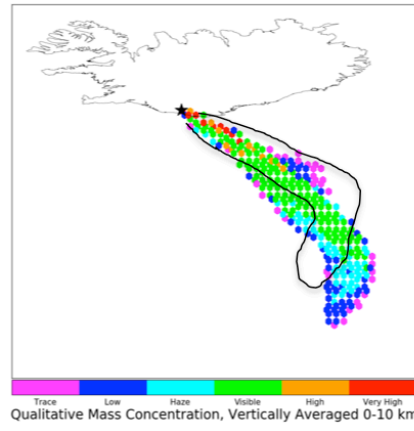

MISR - Nominal Difference

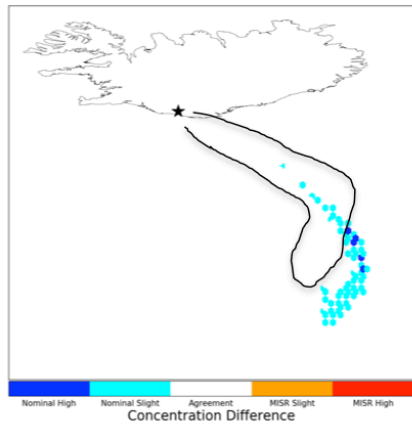

Terra MODIS Truecolor Scene

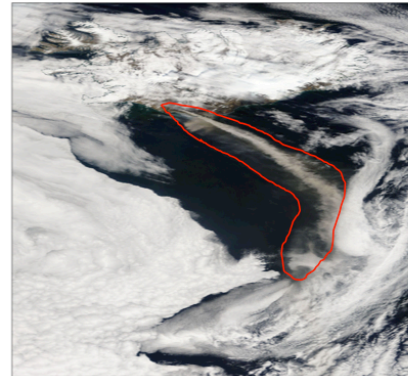

Eyjafjallajokull Eruption Simulation - May 8, 2010 (13:20 UTC)

MISR-Initialized HYSPLIT

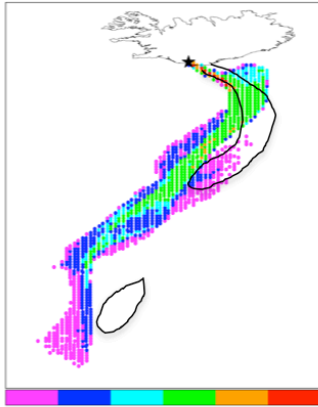

Qualitative Mass Concentration, Vertically Averaged 0-10 km

Nominal HYSPLIT

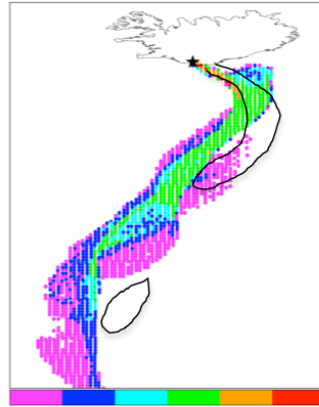

Qualitative Mass Concentration, Vertically Averaged 0-10 km

MISR - Nominal Difference

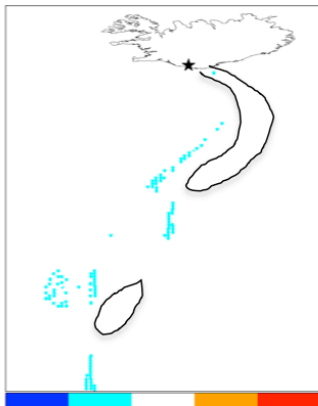

Concentration Difference

Terra MODIS Truecolor Scene

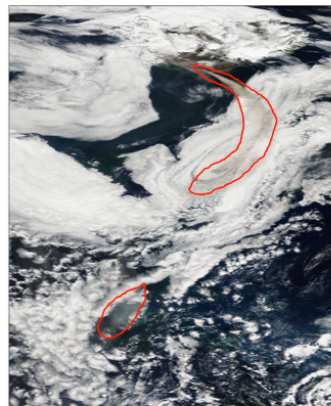

Eyjafjallajokull Eruption Simulation - May 10, 2010 (13:25 UTC)

MISR-Initialized HYSPLIT

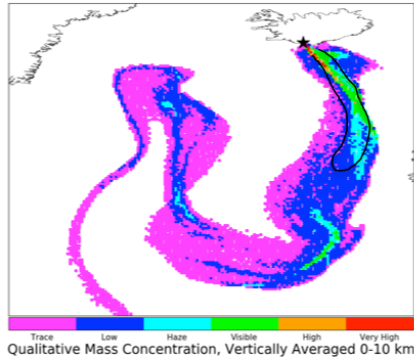

Nominal HYSPLIT

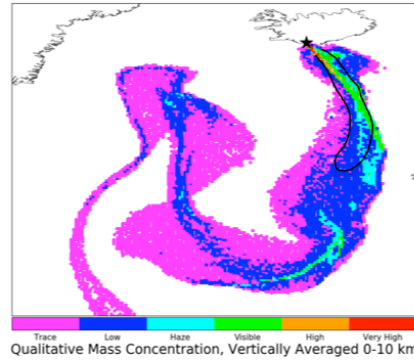

MISR - Nominal Difference

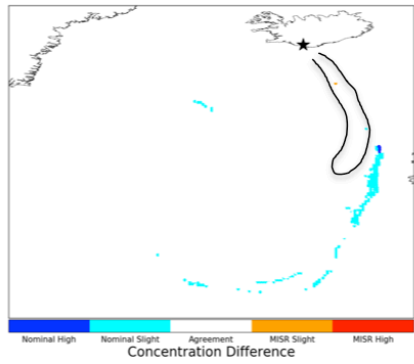

Terra MODIS Truecolor Scene

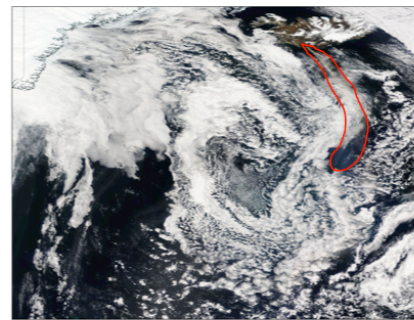

- 1
- 2
- 3 Etna
- 4



Mount Etna Eruption Simulation - July 23, 2001 (10:35 UTC)

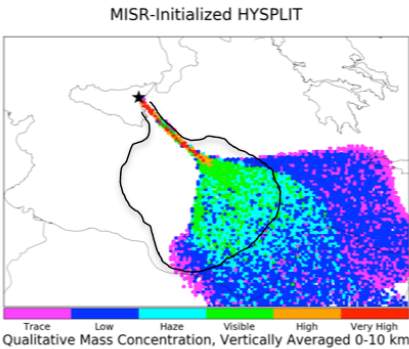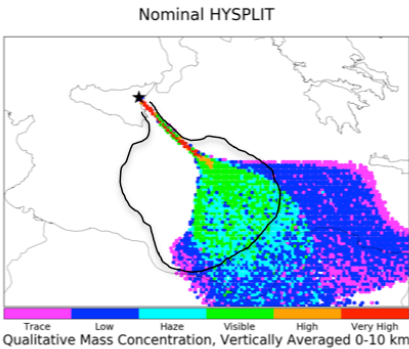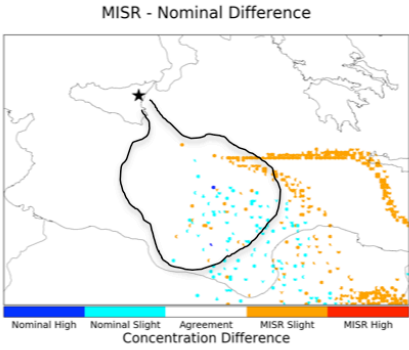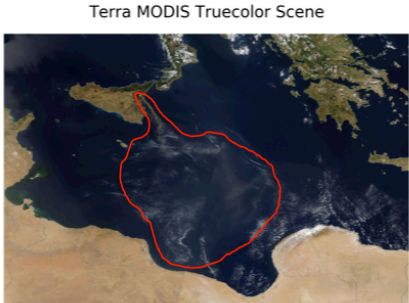

Mount Etna Eruption Simulation - July 24, 2001 (09:40 UTC)

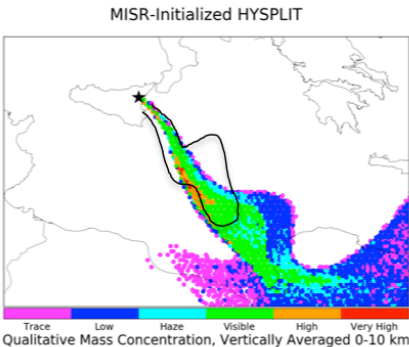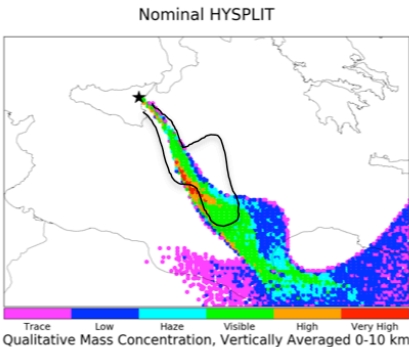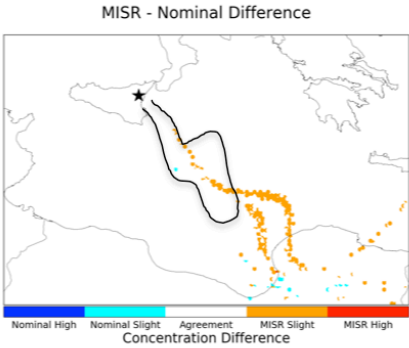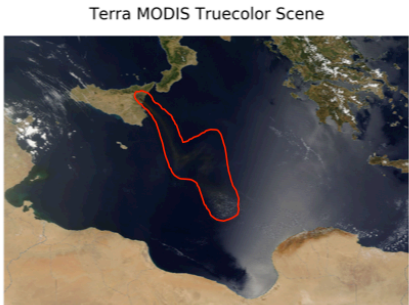

Mount Etna Eruption Simulation - July 25, 2001 (10:25 UTC)

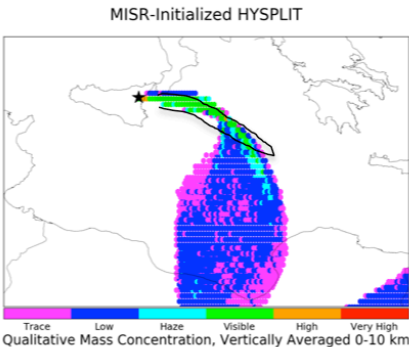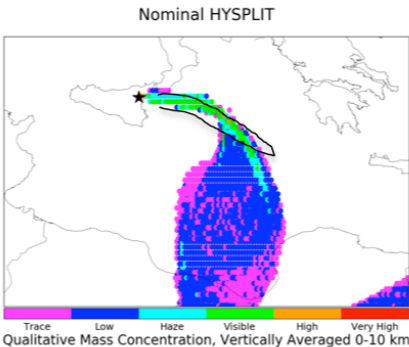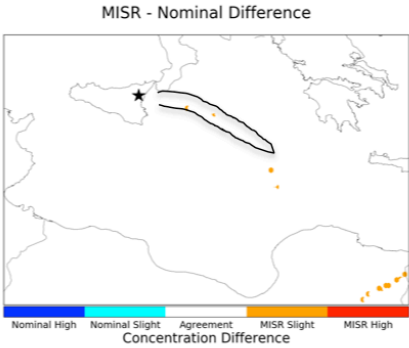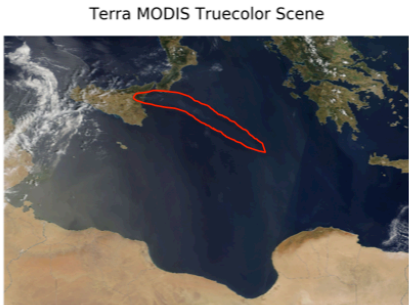

1  
2  
3 Chikurachki  
4

Chikurachki Eruption Simulation - April 22, 2003 (00:45 UTC)

MISR-Initialized HYSPLIT

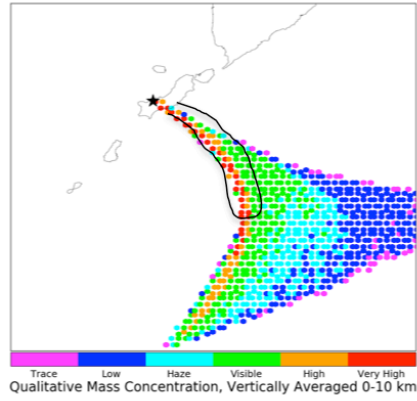

Nominal HYSPLIT

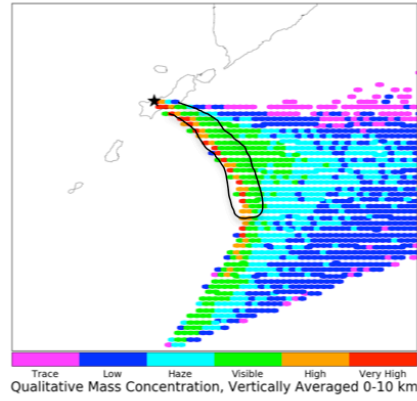

MISR - Nominal Difference

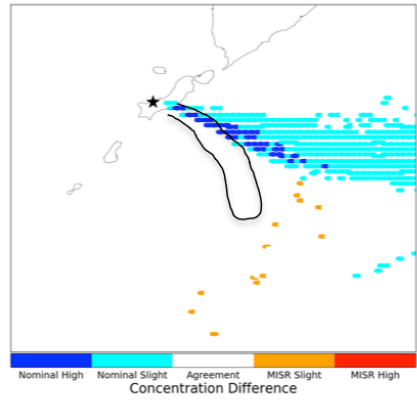

Terra MODIS Truecolor Scene

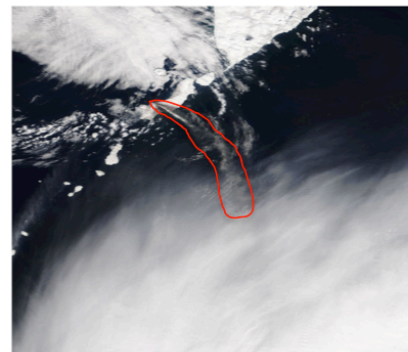



Chikurachki Eruption Simulation - April 23, 2003 (01:25 UTC)

MISR-Initialized HYSPLIT

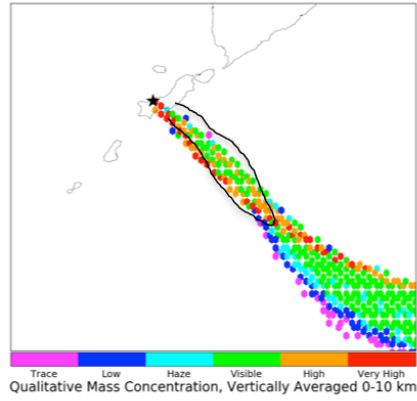

Nominal HYSPLIT

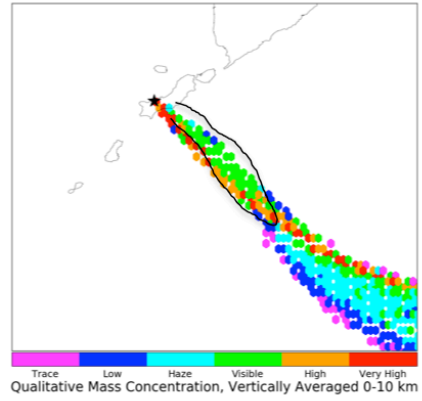

MISR - Nominal Difference

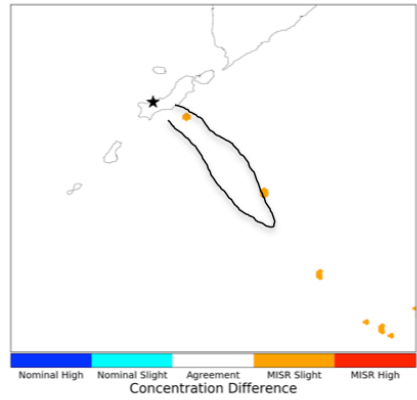

Terra MODIS Truecolor Scene

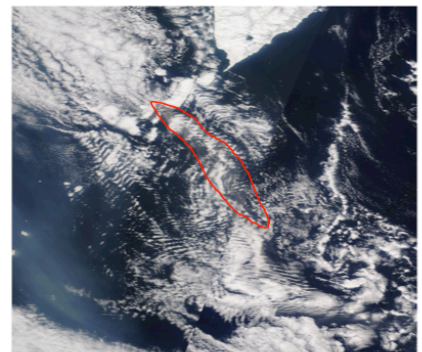

Chikurachki Eruption Simulation - April 24, 2003 (00:30 UTC)

MISR-Initialized HYSPLIT

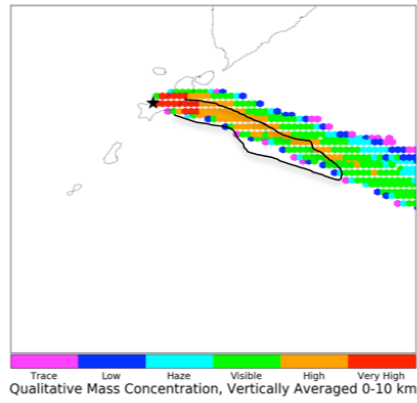

Nominal HYSPLIT

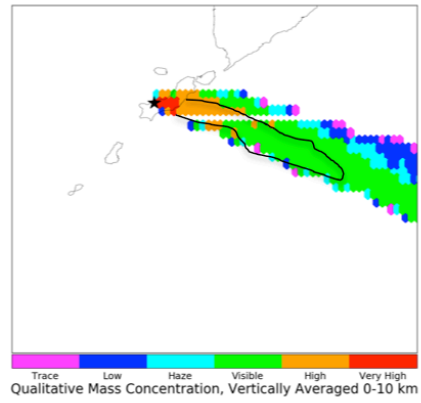

MISR - Nominal Difference

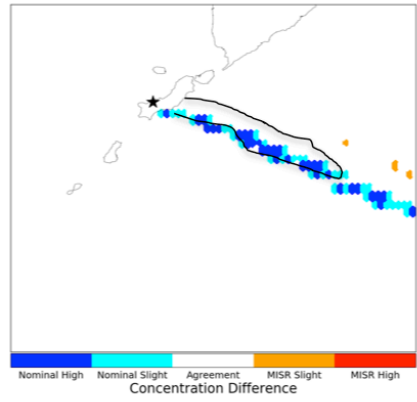

Terra MODIS Truecolor Scene

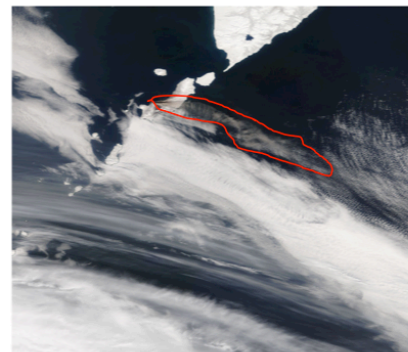

- 1
- 2
- 3
- 4
- 5
- 6

**MINX Height and Wind Plots**

Fort McMurray

### Height Profile : O087148-B043-SPWR01 - May 6, 2016

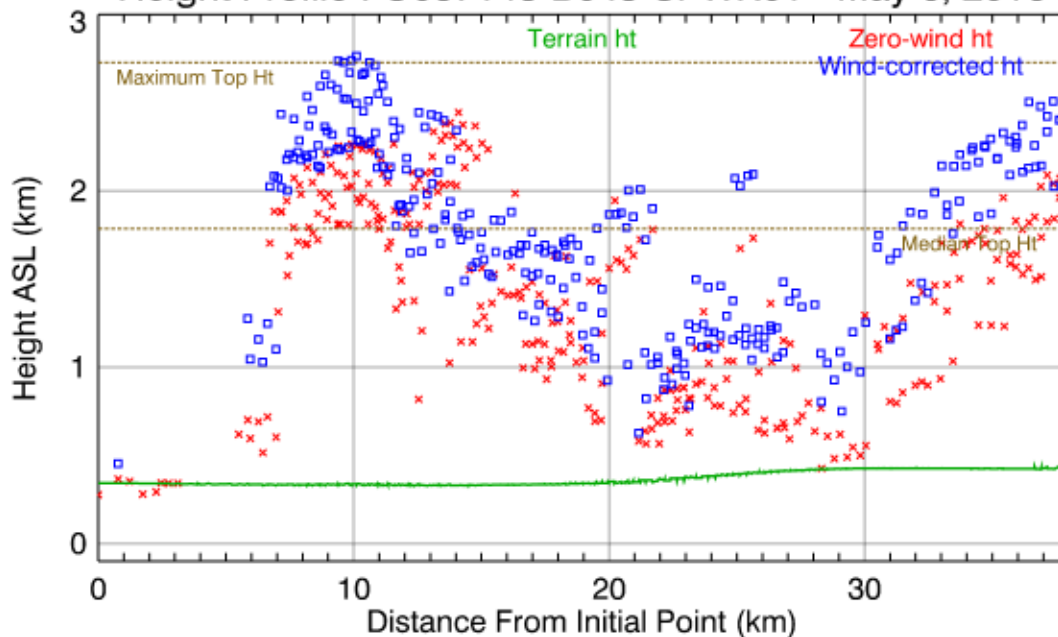

Maximum / Median height estimates: 2.728 / 1.786 km; Retrieval Quality: Good  
Distance axis origin: lat 58.797 / lon -108.513

### Wind Speed Profile : O087148-B043-SPWR01

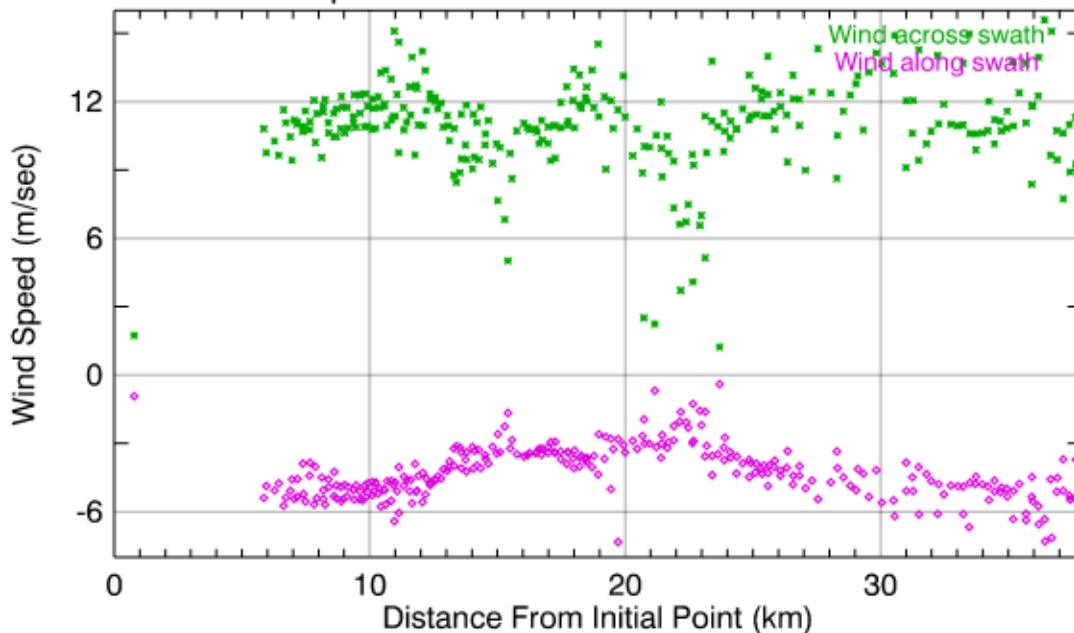

### Height Profile : O087148-B045-SPWR02 - May 6, 2016

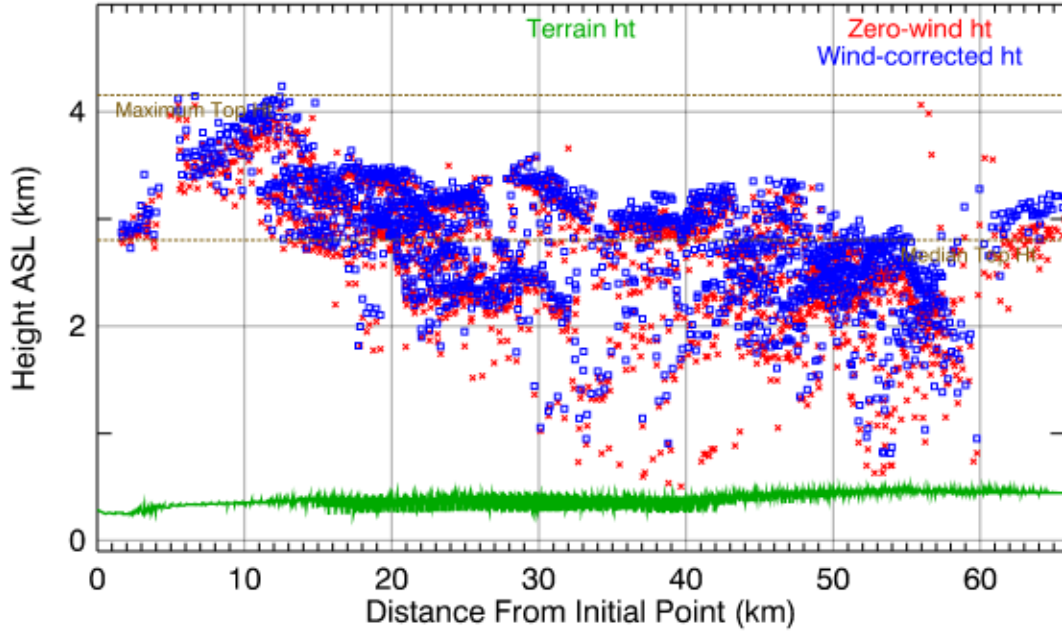

Maximum / Median height estimates: 4.156 / 2.804 km; Retrieval Quality: Good  
Distance axis origin: lat 56.789 / lon -111.435

### Wind Speed Profile : O087148-B045-SPWR02

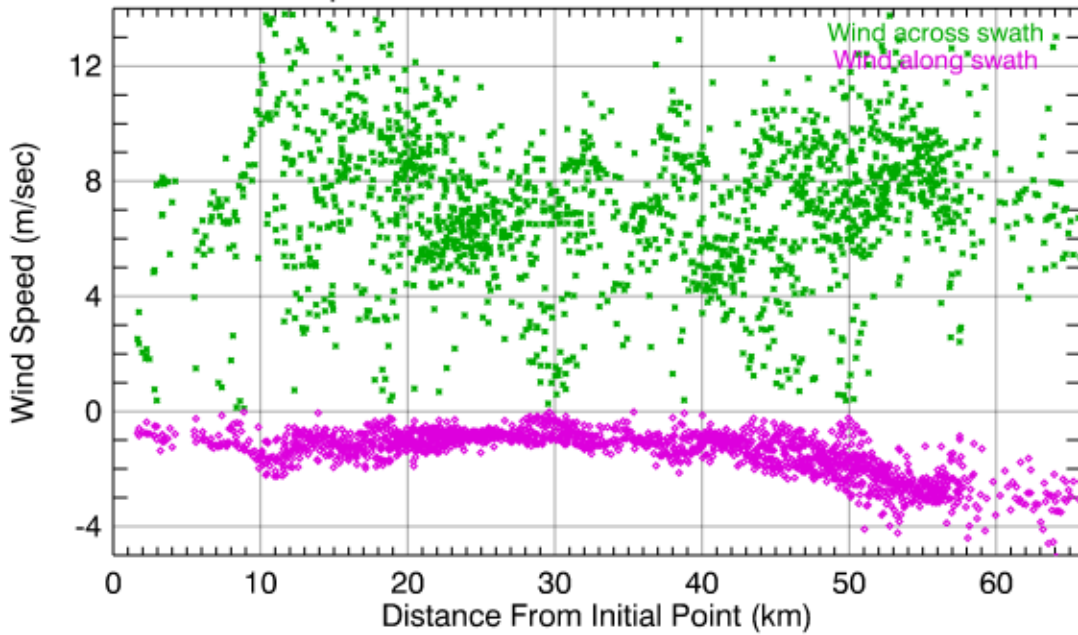

### Height Profile : O087148-B045-SPWR03 - May 6, 2016

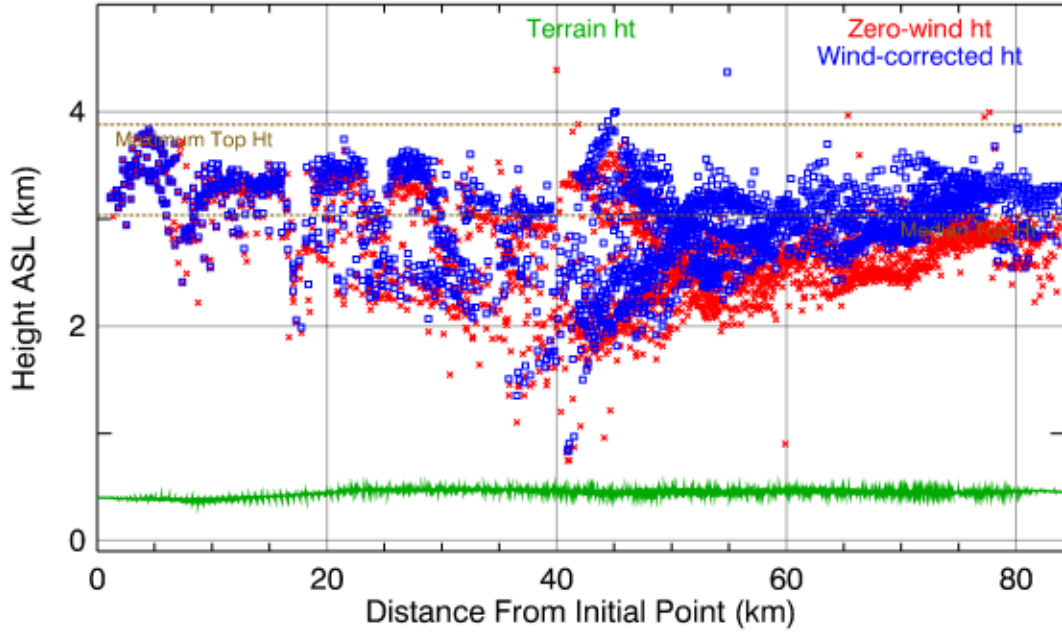

### Wind Speed Profile : O087148-B045-SPWR03

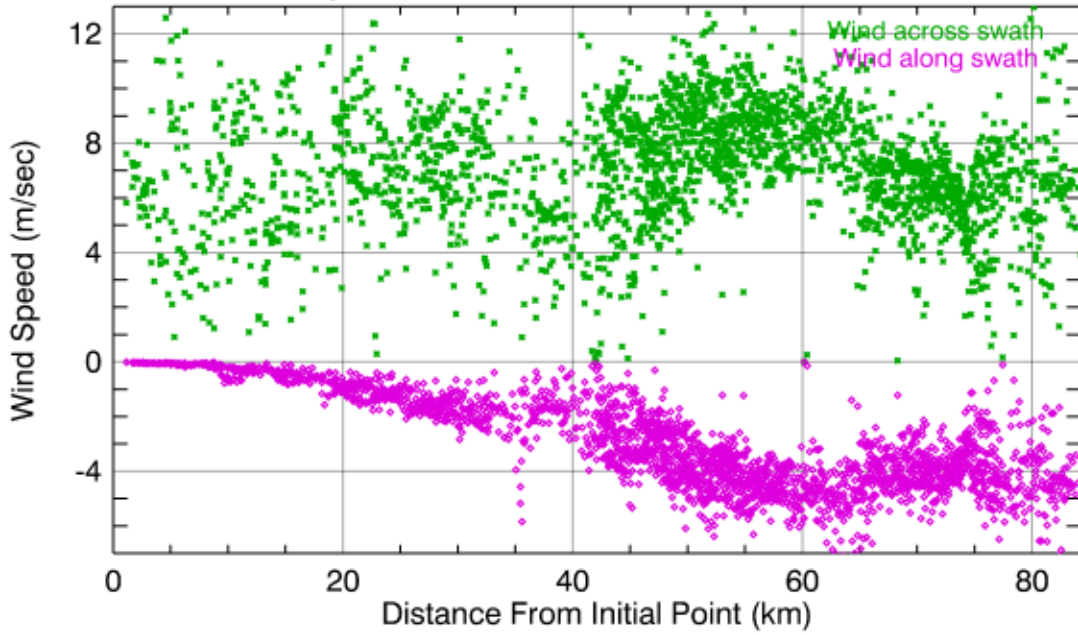

### Height Profile : O087148-B045-SPWR04 - May 6, 2016

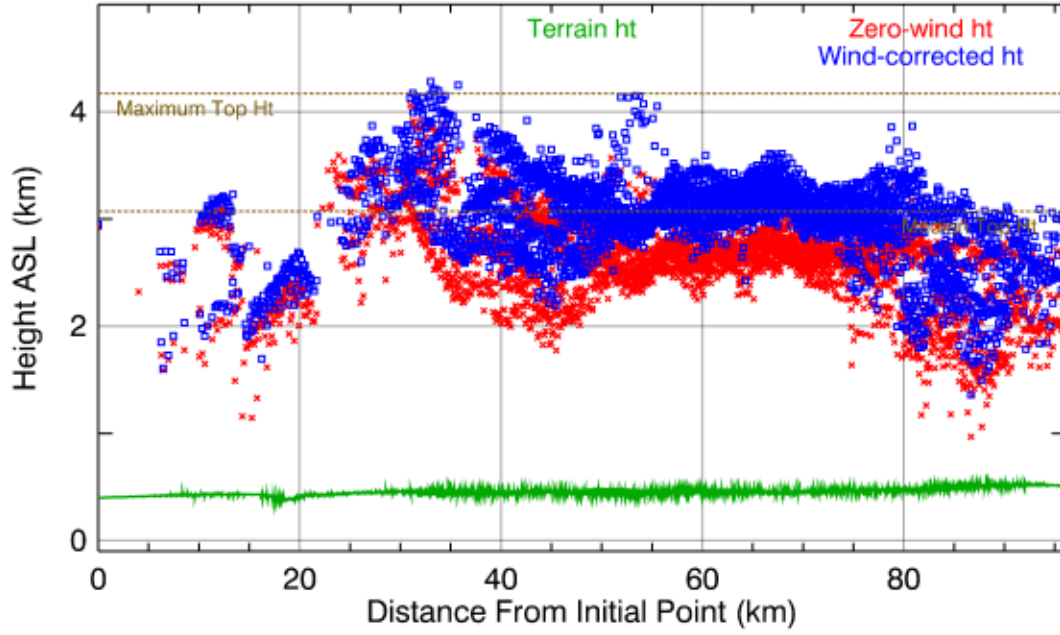

Maximum / Median height estimates: 4.169 / 3.070 km; Retrieval Quality: Good  
Distance axis origin: lat 56.590 / lon -111.060

### Wind Speed Profile : O087148-B045-SPWR04

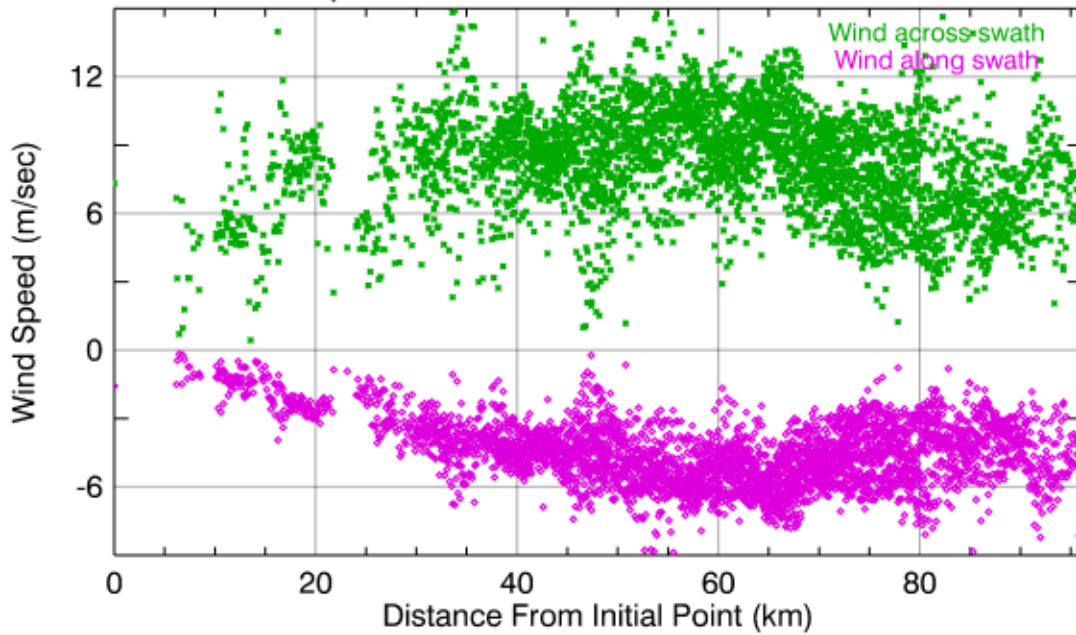

- 1
- 2 Fraser Plateau
- 3



### Height Profile : O093760-B048-SPWR06 - Aug 3, 2017

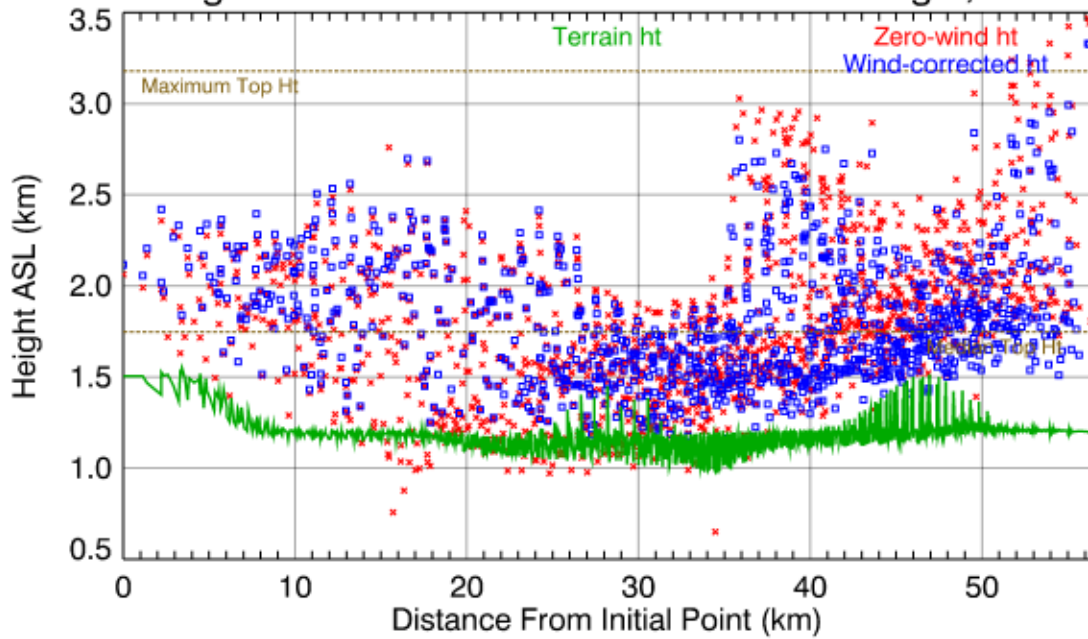

### Wind Speed Profile : O093760-B048-SPWR06

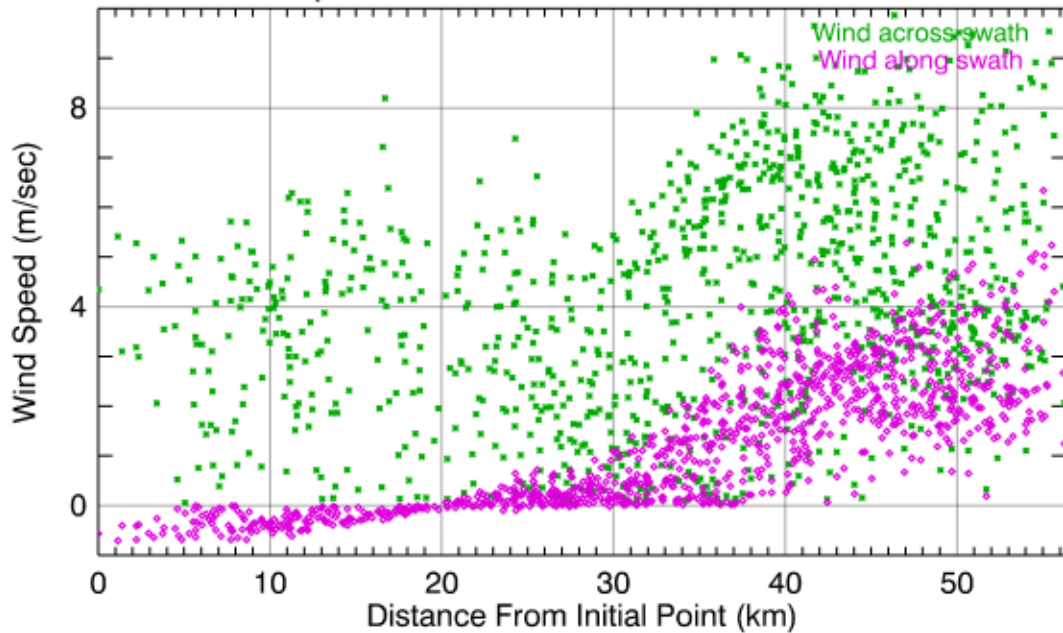

### Height Profile : O093760-B048-SPWR05 - Aug 3, 2017

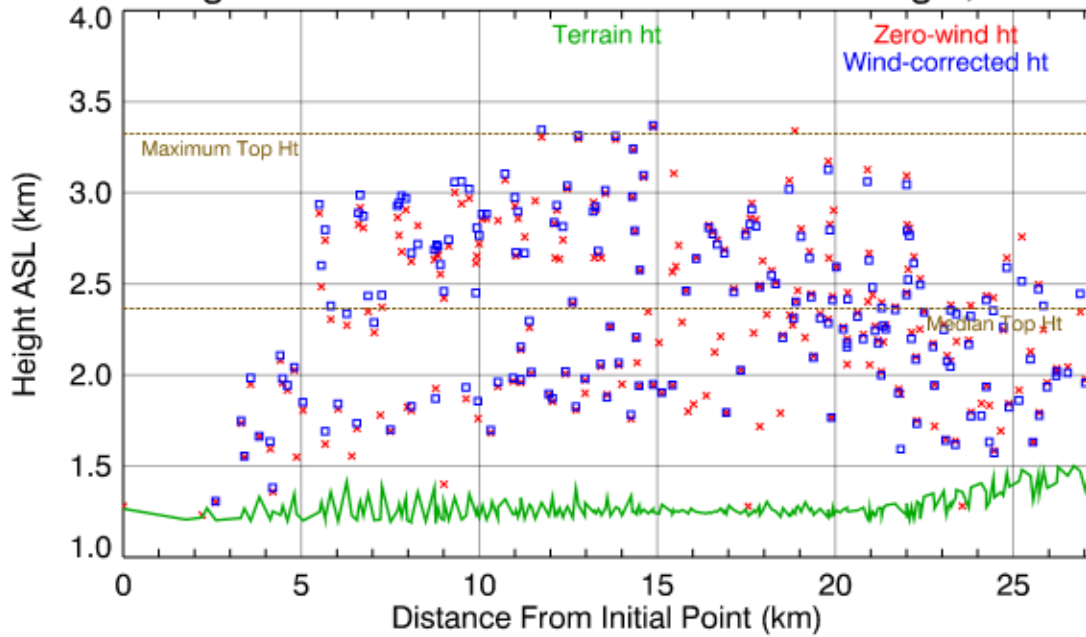

Maximum / Median height estimates: 3.324 / 2.364 km; Retrieval Quality: Good  
Distance axis origin: lat 52.678 / lon -124.216

### Wind Speed Profile : O093760-B048-SPWR05

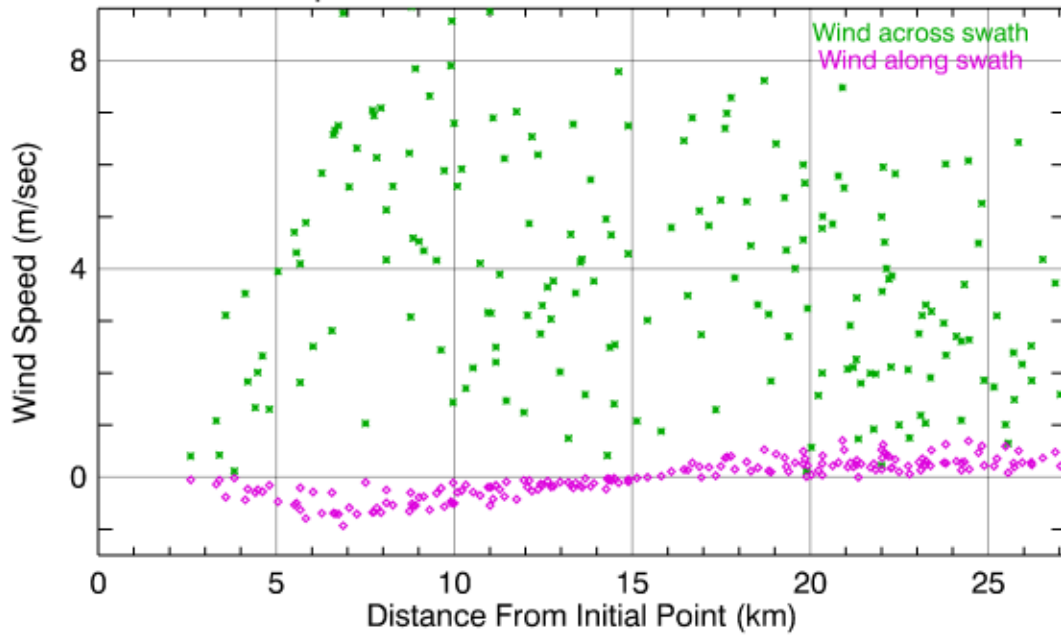

### Height Profile : O093760-B048-SPWR04 - Aug 3, 2017

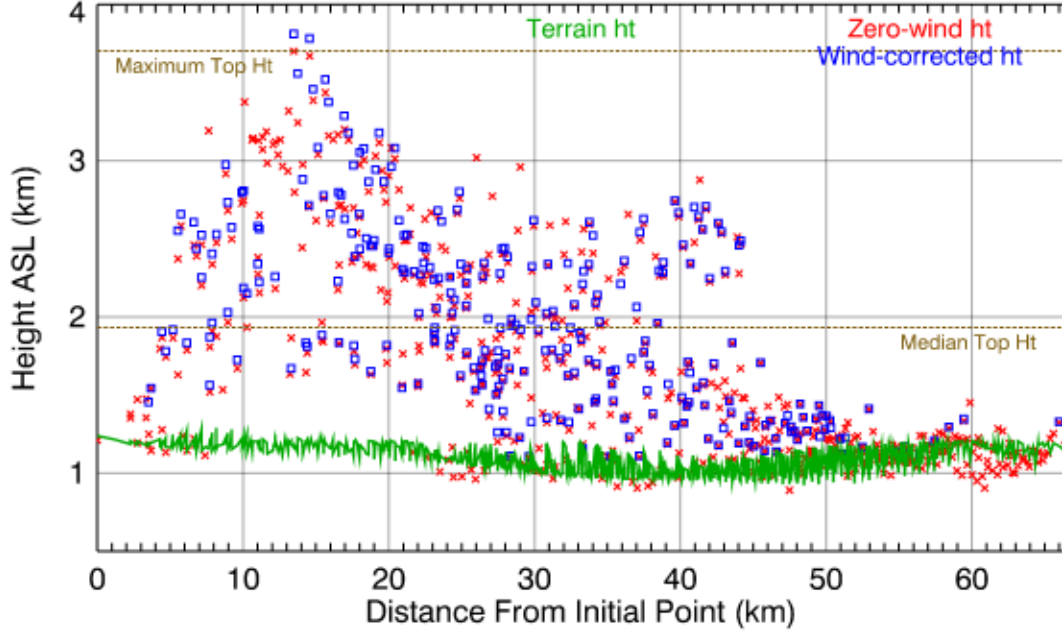

Maximum / Median height estimates: 3.703 / 1.933 km; Retrieval Quality: Good  
Distance axis origin: lat 52.532 / lon -124.468

### Wind Speed Profile : O093760-B048-SPWR04

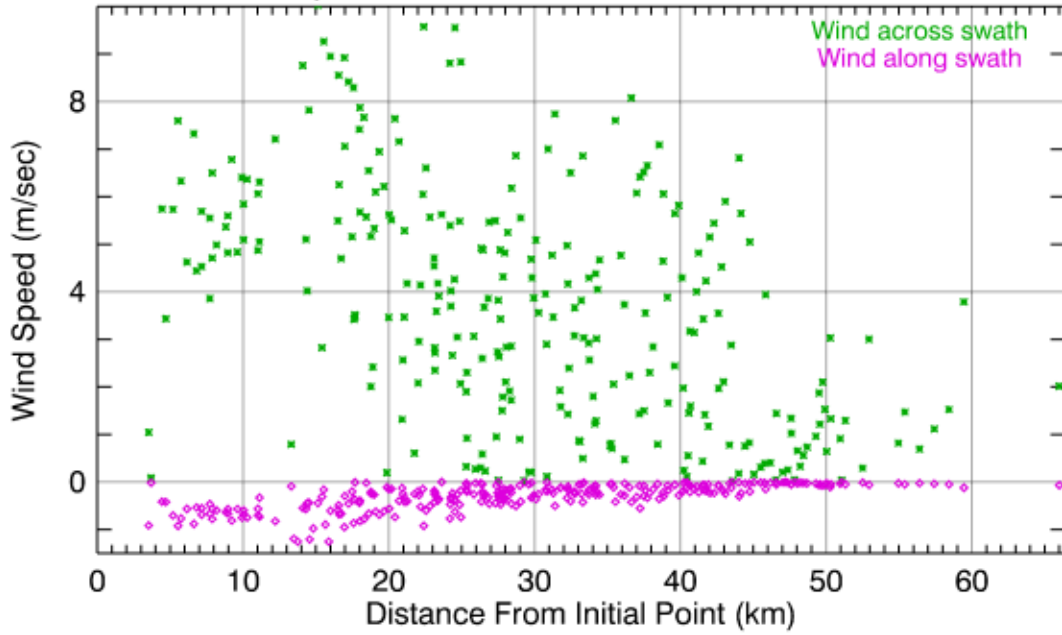

### Height Profile : O093760-B048-SPWR03 - Aug 3, 2017

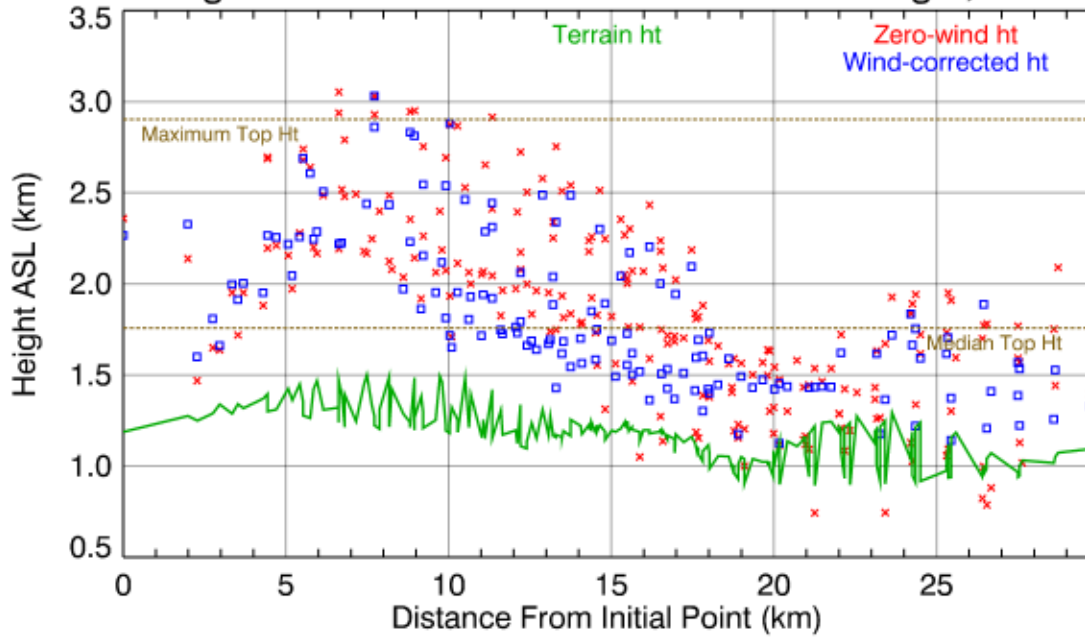

Maximum / Median height estimates: 2.904 / 1.758 km; Retrieval Quality: Good  
Distance axis origin: lat 52.814 / lon -123.840

### Wind Speed Profile : O093760-B048-SPWR03

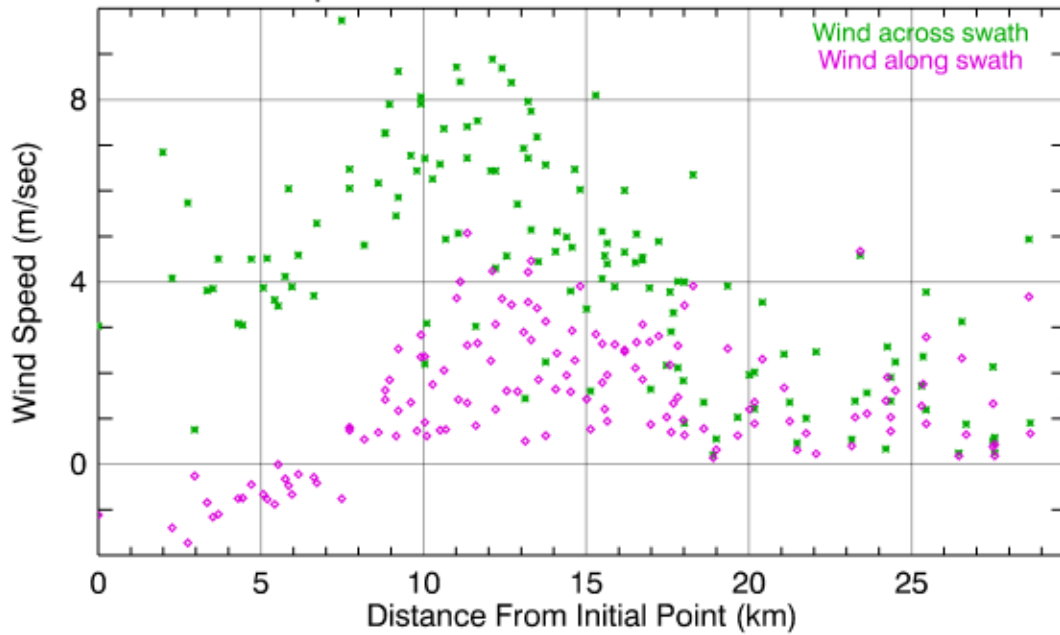

### Height Profile : O093760-B048-SPWR02 - Aug 3, 2017

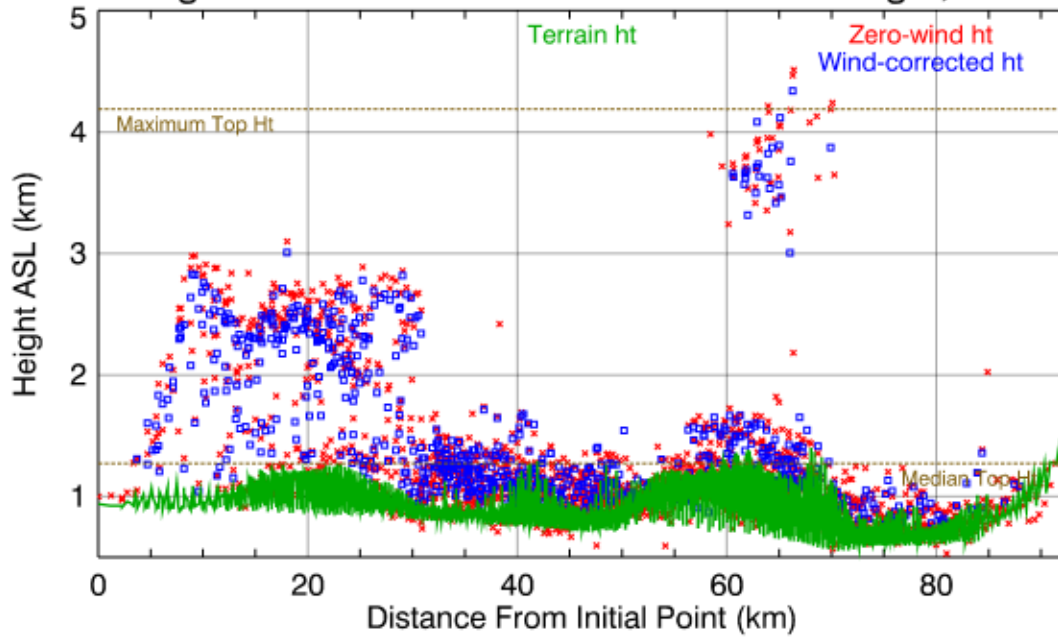

Maximum / Median height estimates: 4.188 / 1.271 km; Retrieval Quality: Good  
Distance axis origin: lat 53.214 / lon -124.250

### Wind Speed Profile : O093760-B048-SPWR02

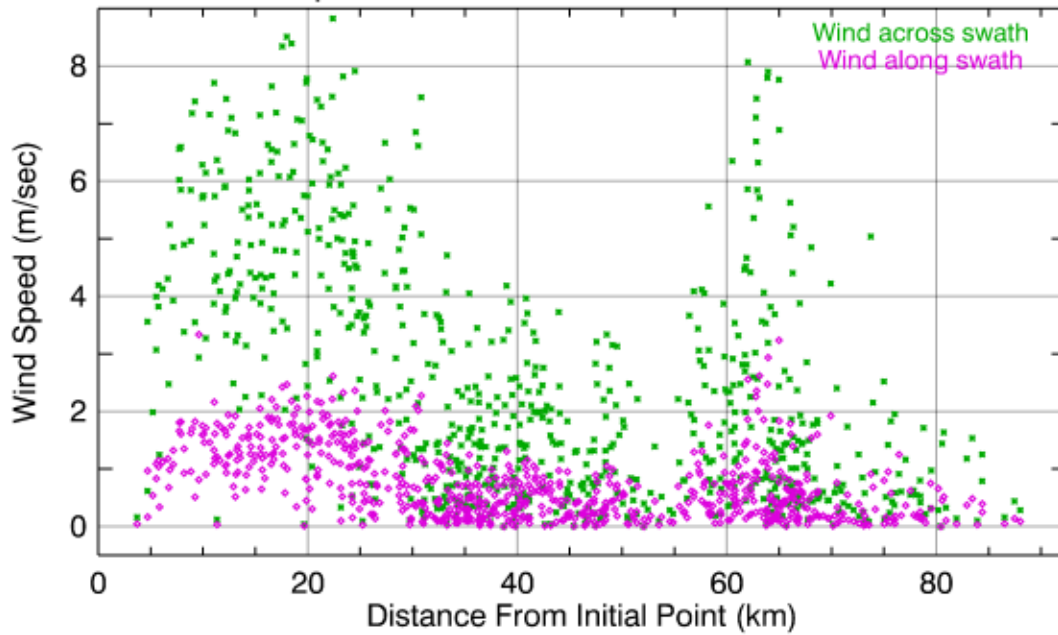

### Height Profile : O093760-B048-SPWR01 - Aug 3, 2017

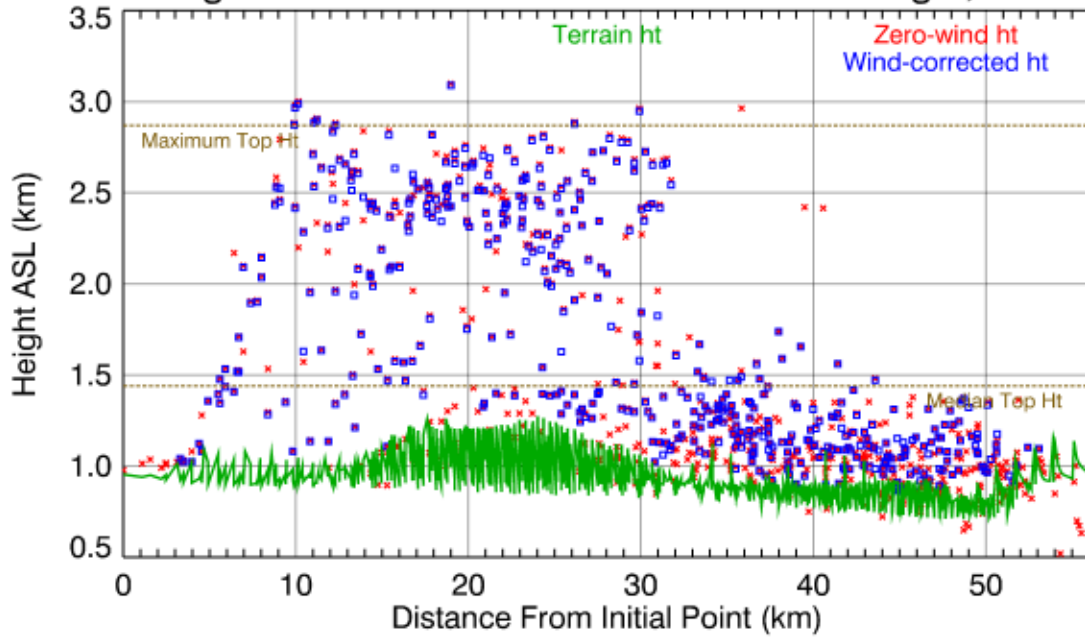

Maximum / Median height estimates: 2.869 / 1.440 km; Retrieval Quality: Good  
Distance axis origin: lat 53.221 / lon -124.264

### Wind Speed Profile : O093760-B048-SPWR01

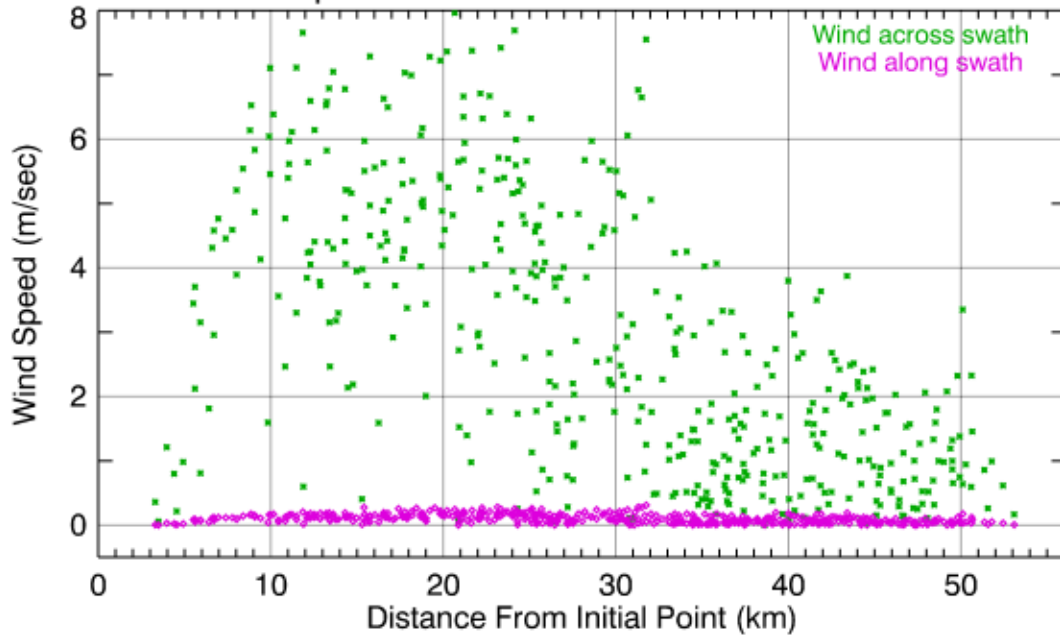

- 1
- 2
- 3
- 4

Thomas Fire



### Height Profile : O095638-B063-SPWR02 - Dec 10, 2017

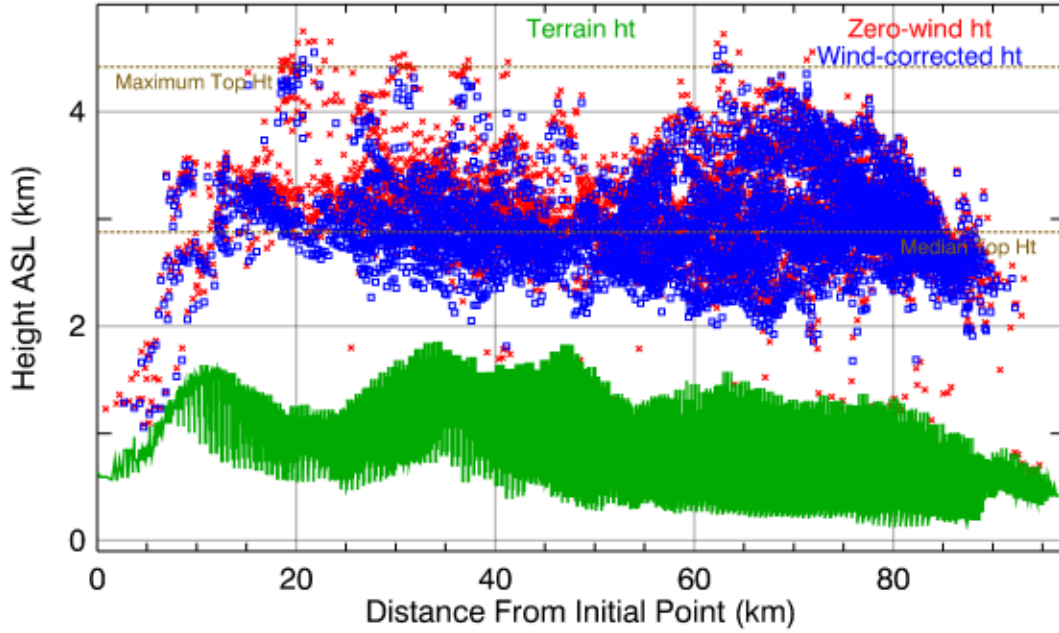

Maximum / Median height estimates: 4.417 / 2.878 km; Retrieval Quality: Good  
Distance axis origin: lat 34.506 / lon -119.358

### Wind Speed Profile : O095638-B063-SPWR02

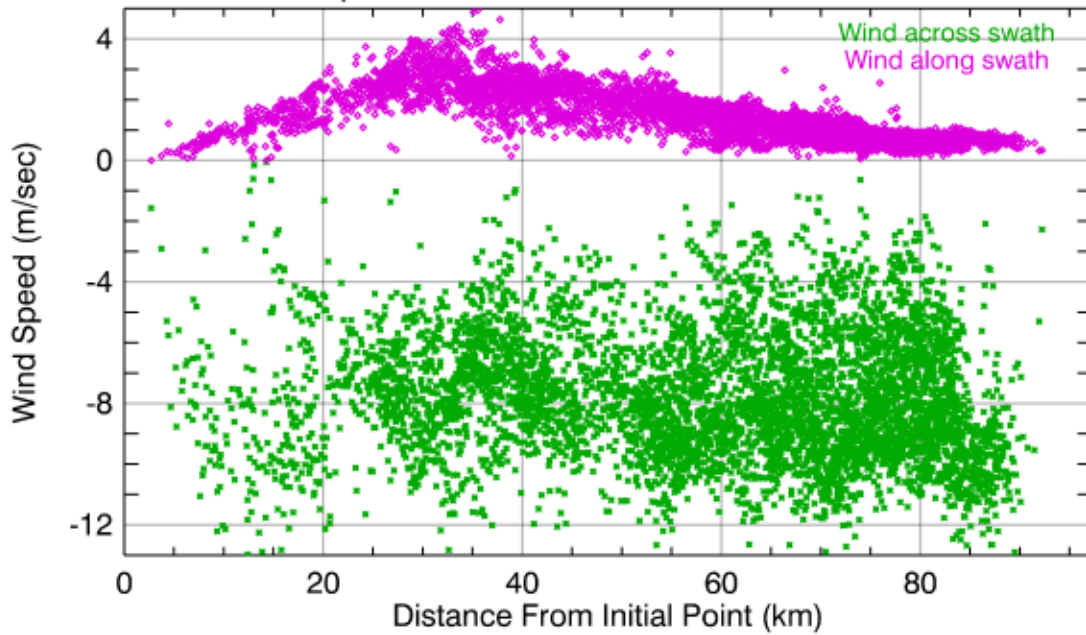

### Height Profile : O095638-B063-SPWR01 - Dec 10, 2017

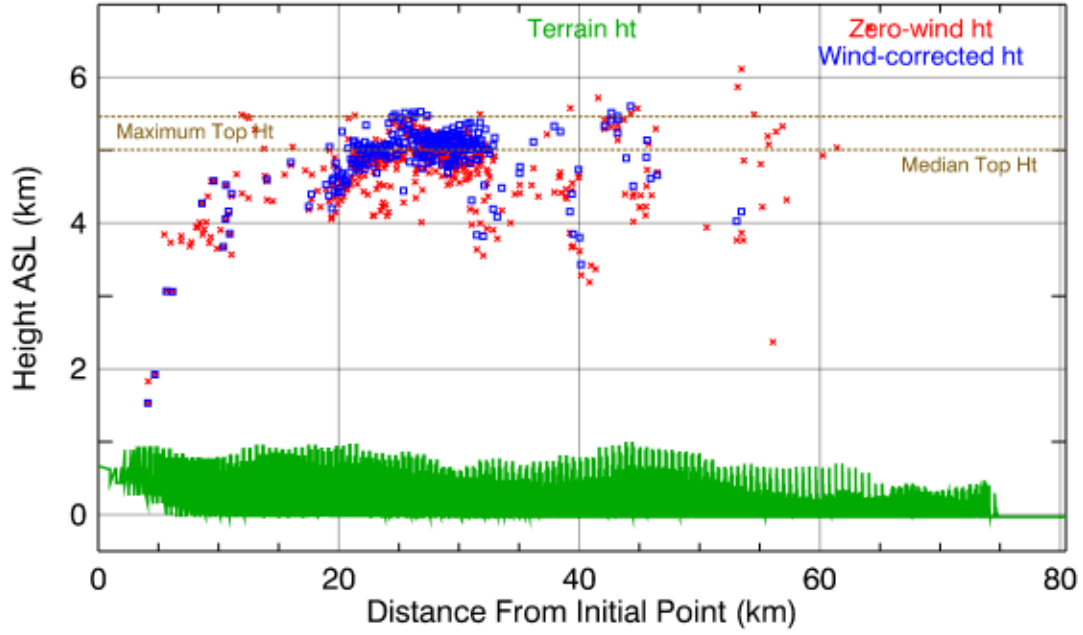

Maximum / Median height estimates: 5.461 / 5.006 km; Retrieval Quality: Poor  
Distance axis origin: lat 34.450 / lon -119.504

### Wind Speed Profile : O095638-B063-SPWR01

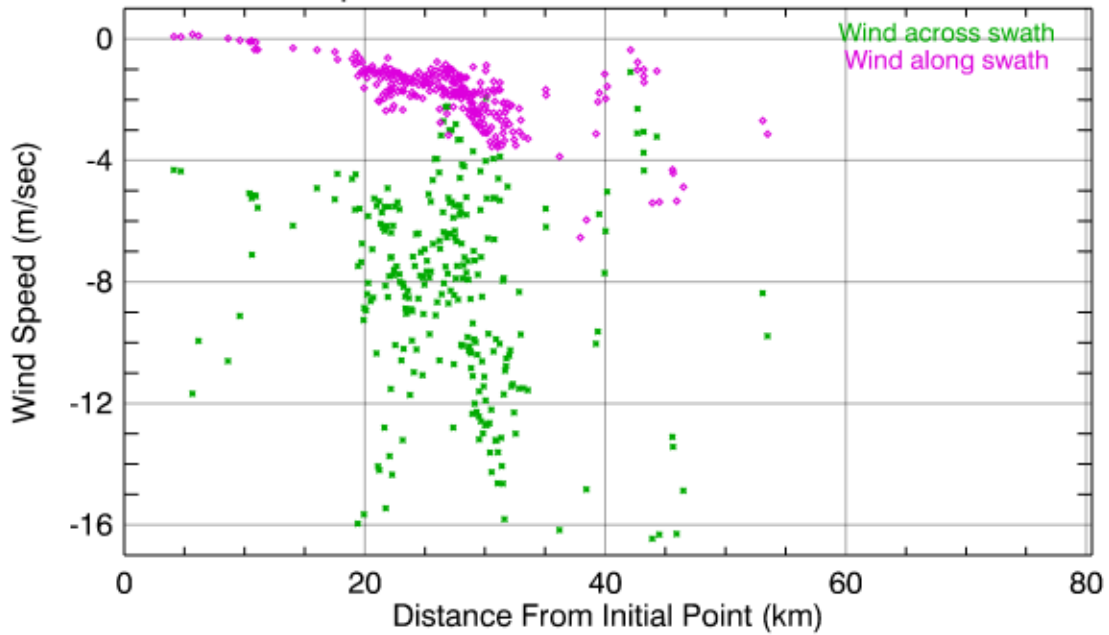

- 1
- 2
- 3 Eyjafjallajokull
- 4

### Height Profile : O055238-B040-VPWR01 - May 7, 2010

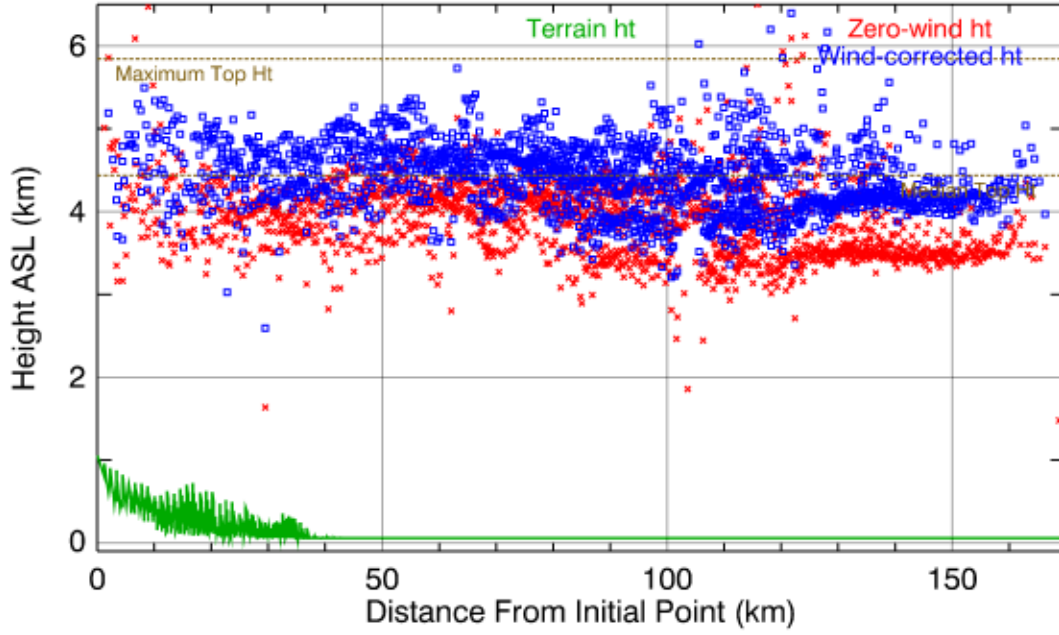

Maximum / Median height estimates: 5.843 / 4.437 km; Retrieval Quality: Good  
Distance axis origin: lat 63.602 / lon -19.542

### Wind Speed Profile : O055238-B040-VPWR01

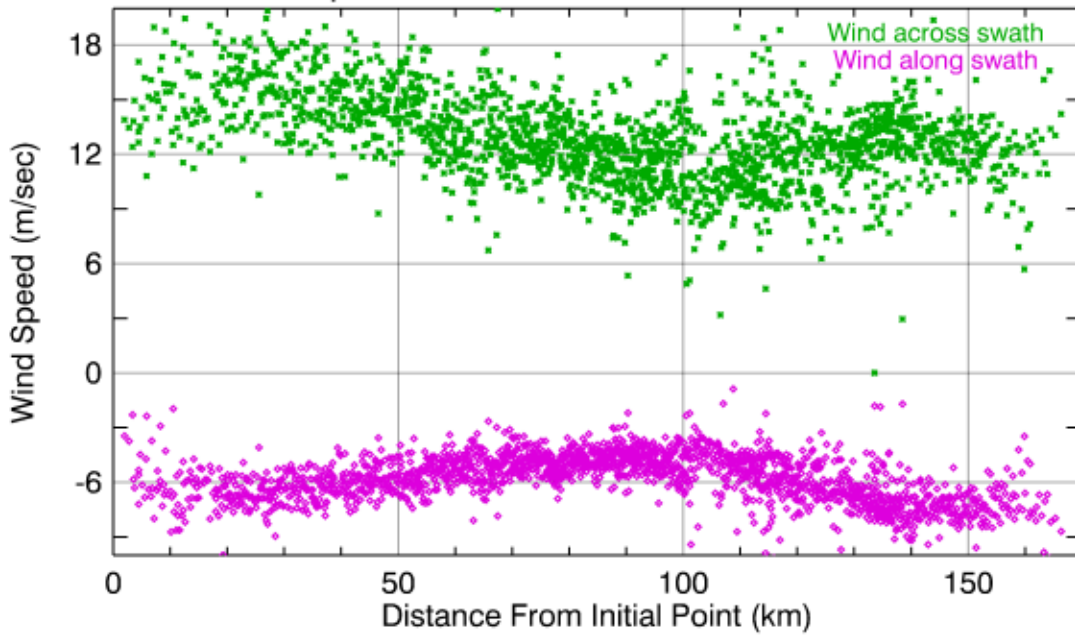

- 1
- 2
- 3 Mount Etna
- 4

### Height Profile : O008476-B060-VPWR01 - July 22, 2001

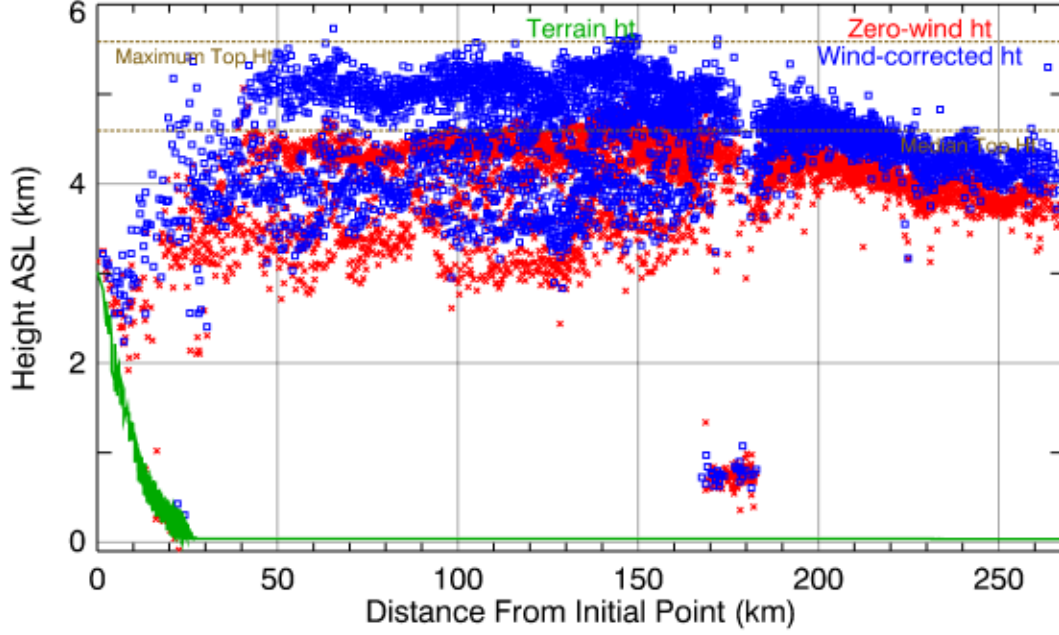

Maximum / Median height estimates: 5.586 / 4.593 km; Retrieval Quality: Good  
Distance axis origin: lat 37.752 / lon 14.994

### Wind Speed Profile : O008476-B060-VPWR01

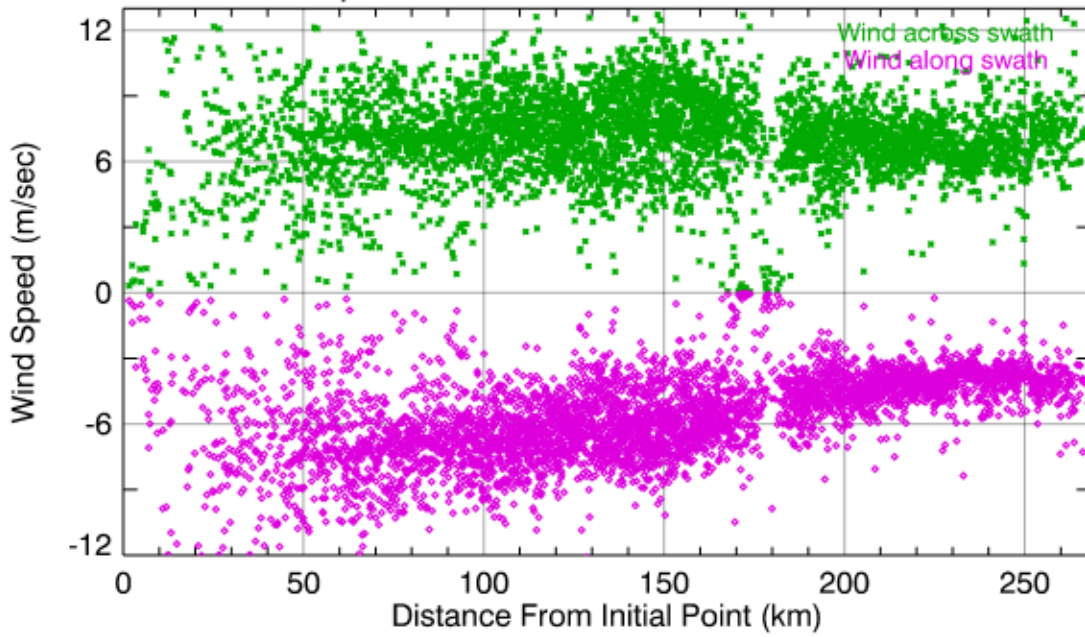

- 1
- 2
- 3 Chikurachhki
- 4

### Height Profile : O017776-B050-VPWR01 - April 22, 2003

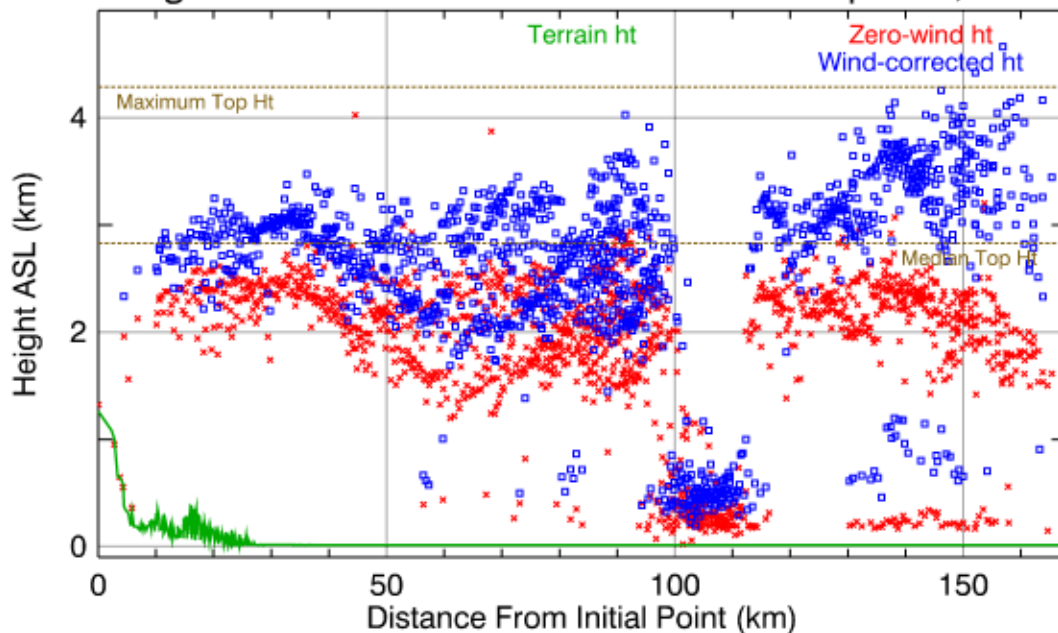

Maximum / Median height estimates: 4.287 / 2.830 km; Retrieval Quality: Good  
Distance axis origin: lat 50.318 / lon 155.457

### Wind Speed Profile : O017776-B050-VPWR01

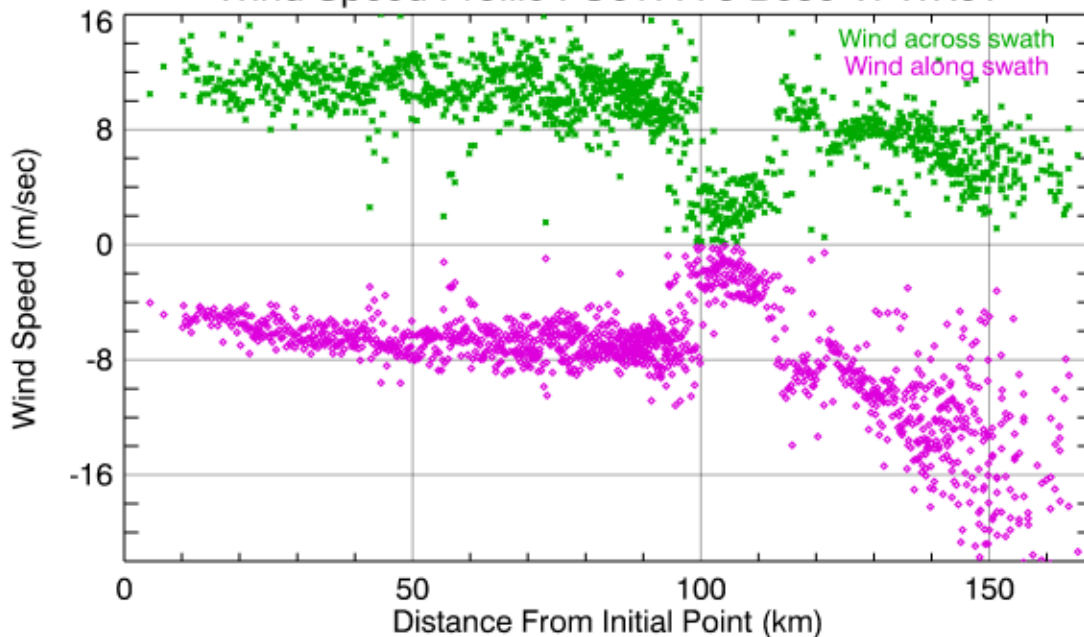

Supplement: Supplementary file 1 [file amt-2018-123-supplement.pdf]
